# Supplementary material for: Stability and chemical bonding in a series of inverse sandwich actinide boride clusters (An2B8) with δ bonding
Source: Royal Society of Chemistry journal article supplement (doi:10.1039/d4cp00915k), 2024-01-01
Supplement: d4cp00915k1.pdf [file d4cp00915k1.pdf]

**Stability and chemical bonding in series of inverse sandwich actinide boride clusters ( $An_2B_8$ ) with  $\delta$  bond**

Shu-Xian Hu,<sup>a,b,\*</sup> Hai-Tao Liu,<sup>c</sup> Zhi-Yu Wei,<sup>a</sup> Bo Wang,<sup>a</sup> Rui-Min Zuo,<sup>a</sup> Ping Zhang<sup>c</sup>

<sup>a</sup> Department of Physics, University of Science and Technology Beijing, Beijing 100083, China.

<sup>b</sup> Beijing Computational Science Research Center, Beijing 100193, China.

<sup>c</sup> Institute of Applied Physics and Computational Mathematics, Beijing 100088, China.

\*Corresponding Authors: hushuxian@csrc.ac.cn (S.-X.H.)

**Table S1.** The relative energies ( $\Delta E$ , eV), T1 diagnostic and  $S^2$  (ideal value in parentheses) for the first isomers of  $U_2B_8$  from the DLPNO-CCSD(T) calculations with three basis sets, along with the relative energy from PBE calculations with plane-wave basis.

| Isomers<br>(ideal $S^2$ ) | PBE  | cc-pvtz-dk3(U)/cc-pvtz-dk(B) |       |       | SARC-DKH-TZVP(U)/DKH-def2-SVP(B) |       |       | TZP-DKH    |       |       |
|---------------------------|------|------------------------------|-------|-------|----------------------------------|-------|-------|------------|-------|-------|
|                           |      | $\Delta E$                   | T1    | $S^2$ | $\Delta E$                       | T1    | $S^2$ | $\Delta E$ | T1    | $S^2$ |
| ISO0 (6.00)               | 0.00 | 0.00                         | 0.018 | 6.00  | 0.00                             | 0.019 | 6.00  | 0.00       | 0.044 | 6.12  |
| ISO1 (6.00)               | 0.46 | 0.93                         | 0.020 | 6.00  | 0.48                             | 0.022 | 6.00  | 2.06       | 0.057 | 6.20  |
| ISO2 (6.00)               | 0.99 | 1.76                         | 0.024 | 6.00  | 1.54                             | 0.027 | 6.00  | 0.31       | 0.024 | 6.00  |
| ISO3 (0.00)               | 1.03 | 4.88                         | 0.019 | 0.00  | 3.46                             | 0.022 | 0.00  | 3.47       | 0.019 | 0.00  |
| ISO4 (12.00)              | 1.17 | 2.59                         | 0.029 | 12.00 | 2.61                             | 0.031 | 12.00 | 2.90       | 0.029 | 12.00 |

**Table S2.** Energy, occupation number (Occ.), iso-surface, type and percent compositions of the valence molecular orbitals of  $U_2B_8$  at the PBE0/TZ2P levels of theory.

| Energy | Occ. | MOs       | Isosurface                                                                          | type         | U     |       |       | B     |       |
|--------|------|-----------|-------------------------------------------------------------------------------------|--------------|-------|-------|-------|-------|-------|
|        |      |           |                                                                                     |              | 7s    | 6d    | 5f    | 2p    | 2s    |
| -1.942 | 0    | $6a_{1g}$ | 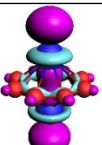 | $6d\sigma_g$ | 21.65 | 42.98 |       | 22.95 | -1.51 |
| -2.138 | 0    | $1e_{3g}$ |  | $5f\phi_g$   |       |       | 92.72 | 7.26  |       |
| -2.922 | 0    | $2e_{2u}$ |  | $5f\delta_u$ |       | 21.56 | 74.50 | 3.07  |       |
| -4.602 | 2    | $2e_{2g}$ |  | $5f\delta_g$ |       | 1.78  | 70.83 | 26.41 |       |
| -5.503 | 1    | $4a_{2u}$ |  | $5f\sigma_u$ | 1.40  | 14.17 | 81.56 | 2.23  |       |

|        |   |                  |                                                                                    |                  |       |       |       |       |       |
|--------|---|------------------|------------------------------------------------------------------------------------|------------------|-------|-------|-------|-------|-------|
| -5.704 | 1 | 5a <sub>1g</sub> | 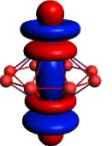  | 5fσ <sub>g</sub> | 1.72  |       | 94.08 | 1.05  |       |
| -5.989 | 4 | 1e <sub>2u</sub> |   | (d-p)δ           |       | 37.36 | 20.86 | 34.94 |       |
| -6.118 | 4 | 2e <sub>1g</sub> |   | (d-π)π           |       | 19.22 | 2.76  | 62.75 |       |
| -6.725 | 4 | 3e <sub>1u</sub> |   | (d-π)π           |       | 11.31 | 8.27  | 51.53 | 20.23 |
| -7.508 | 2 | 4a <sub>1g</sub> |   | π <sub>B-B</sub> |       | 33.30 | 2.29  | 45.30 | 10.67 |
| -8.146 | 2 | 3a <sub>2u</sub> |  | π <sub>B-B</sub> | 17.62 | 5.60  | 8.03  | 71.82 |       |

**Table S3.** The selected bond length (Å,  $R$ ), bond order (MBO, GJBO, NMBO), spin density ( $|e|$ ,  $\mu(\text{An})$ ) and charge ( $|e|$ ,  $Q(\text{An})$  and  $Q(\text{B})$ ), and the measure of 5f-5f overlap ( $S(f_{\text{An}}, f_{\text{An}})$ ) in  $\text{An}_2\text{B}_8$  compounds.

| Species                           | An-An bond order |      |      | An-B  |      | B-B         |           | $\mu(\text{An})$ | $Q(\text{An})$ | $Q(\text{B})$ | $S(f_{\text{An}}, f_{\text{An}})$ |
|-----------------------------------|------------------|------|------|-------|------|-------------|-----------|------------------|----------------|---------------|-----------------------------------|
|                                   | MBO              | GJBO | NMBO | $R$   | NMBO | $R$         | NMBO      |                  |                |               |                                   |
| Th <sub>2</sub> B <sub>8</sub>    | 0.90             | 0.51 | 0.53 | 2.677 | 0.56 | 1.552       | 1.23      | 0.00             | 0.69           | -0.17         | -                                 |
| Pa <sub>2</sub> B <sub>8</sub>    | 1.06             | 1.08 | 1.27 | 2.566 | 0.73 | 1.554       | 1.15      | 0.34             | 0.67           | -0.17         | 0.139                             |
| U <sub>2</sub> B <sub>8</sub>     | 0.83             | 0.80 | 1.21 | 2.567 | 0.75 | 1.543       | 1.21      | 1.89             | 0.73           | -0.18         | 0.124                             |
| Np <sub>2</sub> B <sub>8</sub>    | 0.76             | 0.71 | 1.20 | 2.585 | 0.77 | 1.540       | 1.22      | 3.27             | 0.73           | -0.18         | 0.109                             |
| Pu <sub>2</sub> B <sub>8</sub>    | 0.73             | 0.20 | 0.25 | 2.639 | 0.41 | 1.548       | 1.28      | 4.57             | 0.76           | -0.19         | 0.094                             |
| Am <sub>2</sub> B <sub>8</sub>    | 0.66             | 0.26 | 0.13 | 2.714 | 0.25 | 1.551       | 1.36      | 6.84             | 0.77           | -0.19         | 0.079                             |
| Cm <sub>2</sub> B <sub>8</sub>    | 0.60             | 0.35 | 0.35 | 2.667 | 0.44 | 1.554       | 1.29      | 7.69             | 0.78           | -0.20         | 0.054                             |
| B <sub>8</sub> (D <sub>8h</sub> ) |                  |      |      |       |      | 1.560       | 1.30      |                  |                | 0.00          |                                   |
| B <sub>8</sub> (D <sub>7h</sub> ) |                  |      |      |       |      | 1.789/1.554 | 0.40/1.26 |                  |                | -0.35/0.05    |                                   |

\*MBO: Mayer bond-order analysis GJBO: Gopinatan-Jug bond order analysis; NMBO: Nalewajski-Mrozek bond order analysis 5f-5f direct overlap is indicated by the value of  $S(f_{\text{An}}, f_{\text{An}}) = \text{integrate area}/(R_{\text{An-An}})^2$ .

**Table S4.** Energy, occupation number (Occ.), iso-surface, type and percent compositions of the valence molecular orbitals of  $\text{An}_2\text{B}_8$  at the PBE0/TZ2P levels of theory.

| Energy | Occ | MOs              | Isosurface                                                                          | Th |      |      | B     |       |
|--------|-----|------------------|-------------------------------------------------------------------------------------|----|------|------|-------|-------|
|        |     |                  |                                                                                     | 7s | 6d   | 5f   | 2p    | 2s    |
| -1.303 | 0   | 2e <sub>2g</sub> | 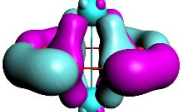 |    | 3.46 | 7.34 | 83.54 | -4.21 |

| -1.513 | 0   | 4a <sub>2u</sub> | 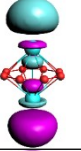   | 48.51 | 35.42 |       |       |       |
|--------|-----|------------------|-------------------------------------------------------------------------------------|-------|-------|-------|-------|-------|
| -1.732 | 0   | 5a <sub>1g</sub> |    | 52.87 | 5.46  |       | 1.20  | -1.10 |
| -4.803 | 4   | 1e <sub>2u</sub> |    |       | 48.98 | 2.58  | 43.45 |       |
| -5.875 | 4   | 3e <sub>1u</sub> |    |       | 11.58 | 4.65  | 59.29 | 17.22 |
| -5.899 | 4   | 2e <sub>1g</sub> |    |       | 23.28 |       | 63.60 |       |
| -7.099 | 2   | 4a <sub>1g</sub> |   |       | 30.33 |       | 46.84 | 13.85 |
| -7.216 | 2   | 1b <sub>1g</sub> |  |       |       |       | 81.36 |       |
| -7.440 | 2   | 3a <sub>2u</sub> |  | 20.51 | 5.11  | 2.18  | 76.36 |       |
|        |     |                  |                                                                                     |       |       |       |       |       |
| Energy | Occ | MOs              | Isosurface                                                                          | Pa    |       |       | B     |       |
|        |     |                  |                                                                                     | 7s    | 6d    | 5f    | 2p    | 2s    |
| -1.931 | 0   | 4a <sub>2u</sub> |  | 20.85 | 47.77 | 28.77 |       |       |
| -2.510 | 0   | 5a <sub>1g</sub> |  | 22.17 | 27.20 | 24.27 | 18.39 | -1.35 |
| -3.992 | 2   | 2e <sub>2g</sub> |  |       | -1.11 | 42.31 | 51.15 |       |

| -5.717 | 4   | 1e <sub>2u</sub> | 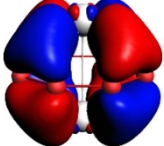   |       | 47.75 | 6.57  | 38.27 |       |
|--------|-----|------------------|-------------------------------------------------------------------------------------|-------|-------|-------|-------|-------|
| -6.181 | 4   | 2e <sub>1g</sub> |    |       | 20.19 | 4.49  | 59.49 |       |
| -7.048 | 4   | 3e <sub>1u</sub> |    |       | 11.39 | 8.00  | 49.11 | 22.27 |
| -7.541 | 2   | 1b <sub>1g</sub> |    |       |       |       | 81.47 |       |
| -7.593 | 2   | 4a <sub>1g</sub> |    |       | 33.77 |       | 46.49 | 10.91 |
| -8.101 | 2   | 3a <sub>2u</sub> |   | 18.31 | 8.46  | 2.87  | 73.53 |       |
|        |     |                  |                                                                                     |       |       |       |       |       |
| Energy | Occ | MOs              | Isosurface                                                                          | Np    |       |       | B     |       |
|        |     |                  |                                                                                     | 7s    | 6d    | 5f    | 2p    | 2s    |
| -1.804 | 0   | 6a <sub>1g</sub> |  | 45.61 | 24.73 |       | 10.15 | -2.13 |
| -2.774 | 0   | 2e <sub>3u</sub> |  |       |       | 93.79 | 4.59  |       |
| -3.251 | 0   | 2e <sub>2u</sub> |  |       | 41.55 | 37.16 | 19.15 |       |
| -4.240 | 2   | 1e <sub>3g</sub> |  |       |       | 96.14 | 3.50  |       |
| -5.182 | 2   | 2e <sub>2g</sub> |  |       | 2.05  | 81.87 | 15.35 |       |

| -5.763 | 4   | 1e <sub>2u</sub> | 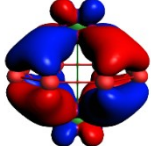   |       | 14.90 | 59.96 | 20.62 |       |
|--------|-----|------------------|-------------------------------------------------------------------------------------|-------|-------|-------|-------|-------|
| -5.903 | 4   | 2e <sub>1g</sub> |    |       | 18.89 | 2.32  | 63.69 |       |
| -5.971 | 1   | 4a <sub>2u</sub> |    | 3.28  | 10.62 | 79.50 | 7.12  |       |
| -6.431 | 4   | 3e <sub>1u</sub> |    |       | 10.80 | 8.54  | 53.34 | 18.59 |
| -6.457 | 1   | 5a <sub>1g</sub> |    |       | 1.17  | 92.15 | 2.51  | 1.62  |
| -7.411 | 2   | 4a <sub>1g</sub> |   |       | 29.13 | 5.61  | 46.01 | 11.53 |
| -7.413 | 2   | 1b <sub>1g</sub> |  |       |       |       | 80.86 |       |
| -7.976 | 2   | 3a <sub>2u</sub> |  | 16.50 | 3.76  | 14.19 | 68.48 |       |
|        |     |                  |                                                                                     |       |       |       |       |       |
| Energy | Occ | MOs              | Isosurface                                                                          | Pu    |       |       | B     |       |
|        |     |                  |                                                                                     | 7s    | 6d    | 5f    | 2p    | 2s    |
| -1.831 | 0   | 4e <sub>1u</sub> |  |       | 12.36 | 81.85 | 2.82  |       |
| -1.844 | 0   | 6a <sub>1g</sub> |  | 52.46 | 9.48  |       | 1.24  |       |
| -3.102 | 0   | 2e <sub>2u</sub> |  |       | 48.87 | 8.18  | 35.43 |       |

|        |     |           |                                                                                     |       |       |       |       |       |
|--------|-----|-----------|-------------------------------------------------------------------------------------|-------|-------|-------|-------|-------|
| -5.135 | 2   | $2e_{3u}$ | 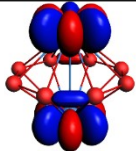   |       |       | 92.89 | 3.99  |       |
| -5.396 | 2   | $1e_{3g}$ |    |       |       | 97.59 | 1.88  |       |
| -5.717 | 4   | $2e_{1g}$ |    |       | 14.75 | 1.34  | 66.36 |       |
| -5.771 | 2   | $2e_{2g}$ |    |       | 2.87  | 87.53 | 8.88  |       |
| -6.056 | 4   | $1e_{2u}$ |    |       | 1.23  | 88.81 | 7.85  |       |
| -6.089 | 4   | $3e_{1u}$ |   |       | 5.31  | 9.29  | 60.01 | 15.27 |
| -6.427 | 1   | $4a_{2u}$ |  | 10.75 | 7.89  | 66.54 | 16.46 |       |
| -6.882 | 1   | $5a_{1g}$ |  | 1.35  | 5.53  | 74.16 | 11.83 | 3.20  |
| -7.370 | 2   | $1b_{1g}$ |  |       |       |       | 80.79 |       |
| -7.389 | 2   | $4a_{1g}$ |  |       | 20.31 | 23.36 | 34.63 | 14.88 |
| -7.856 | 2   | $3a_{2u}$ |  | 13.07 | 1.40  | 28.63 | 59.33 |       |
|        |     |           |                                                                                     |       |       |       |       |       |
| Energy | Occ | MOs       | Isosurface                                                                          | Am    |       |       | B     |       |
|        |     |           |                                                                                     | 7s    | 6d    | 5f    | 2p    | 2s    |

|        |   |                  |                                                                                     |       |       |       |       |      |
|--------|---|------------------|-------------------------------------------------------------------------------------|-------|-------|-------|-------|------|
| -1.451 | 0 | 5a <sub>2u</sub> | 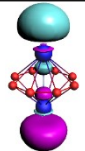   | 59.78 | 21.43 |       |       |      |
| -1.927 | 0 | 6a <sub>1g</sub> |    | 54.36 |       |       |       |      |
| -2.909 | 0 | 2e <sub>2u</sub> |    |       | 35.29 | 35.48 | 24.42 |      |
| -4.869 | 2 | 2e <sub>2g</sub> |    |       |       | 88.68 | 10.14 |      |
| -5.036 | 2 | 4e <sub>1u</sub> |    |       | 9.36  | 43.46 | 34.01 | 5.77 |
| -5.330 | 1 | 4a <sub>2u</sub> |   | 4.08  | 3.75  | 90.12 | 2.55  |      |
| -5.490 | 2 | 2e <sub>3u</sub> |  |       |       | 95.31 | 2.77  |      |
| -5.568 | 2 | 3e <sub>1g</sub> |  |       |       | 94.94 | 3.46  |      |
| -5.570 | 2 | 1e <sub>2u</sub> |  |       | 10.79 | 62.35 | 22.49 |      |
| -5.594 | 1 | 5a <sub>1g</sub> |  | 1.66  |       | 94.86 | 2.20  |      |
| -5.687 | 2 | 1e <sub>3g</sub> |  |       |       | 98.30 | 1.57  |      |
| -6.340 | 4 | 2e <sub>1g</sub> |  | 12.87 |       | 3.23  | 66.01 |      |

| -6.357 | 4   | $3e_{1u}$ | 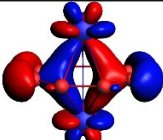   |       |       | 52.89 | 36.10 | 5.94  |
|--------|-----|-----------|-------------------------------------------------------------------------------------|-------|-------|-------|-------|-------|
| -7.270 | 2   | $4a_{1g}$ |    |       | 17.68 | 3.78  | 54.81 | 15.58 |
| -7.521 | 2   | $3a_{2u}$ |    |       |       |       | 80.99 | 19.87 |
|        |     |           |                                                                                     |       |       |       |       |       |
| Energy | Occ | MOs       | Isosurface                                                                          | Cm    |       |       | B     |       |
|        |     |           |                                                                                     | 7s    | 6d    | 5f    | 2p    | 2s    |
| -1.478 | 0   | $3e_{2g}$ |    |       | 25.20 |       | 64.96 | -1.86 |
| -1.563 | 0   | $5a_{2u}$ |   | 64.50 | 25.15 |       |       |       |
| -2.034 | 0   | $6a_{1g}$ |  | 54.82 |       |       | -1.29 |       |
| -5.010 | 2   | $2e_{2u}$ |  |       | 49.51 | 1.76  | 42.89 |       |
| -5.749 | 4   | $4e_{1u}$ |  |       | 13.86 | 4.97  | 58.65 | 11.02 |
| -6.550 | 4   | $3e_{1g}$ |  |       | 13.52 |       | 70.26 |       |
| -7.361 | 2   | $5a_{1g}$ |  |       | 20.42 | 4.98  | 50.50 | 15.37 |
| -7.600 | 2   | $1b_{1g}$ |  |       |       |       | 80.88 |       |



|        |   |                  |                                                                                     |       |      |       |       |      |
|--------|---|------------------|-------------------------------------------------------------------------------------|-------|------|-------|-------|------|
| -7.762 | 1 | 4a <sub>2u</sub> | 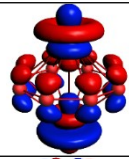   | 11.87 | 6.15 | 53.13 | 32.36 |      |
| -7.943 | 2 | 2e <sub>3u</sub> |    |       |      | 72.06 | 19.08 | 4.38 |
| -8.185 | 2 | 2e <sub>2g</sub> |    |       | 2.24 | 91.77 | 3.83  | 1.29 |
| -8.308 | 2 | 2e <sub>1g</sub> |    |       | 0.70 | 98.79 |       |      |
| -8.353 | 2 | 1e <sub>3g</sub> |    |       |      | 99.19 | 0.75  |      |
| -8.412 | 2 | 1e <sub>2u</sub> |   |       |      | 97.21 | 2.11  |      |
| -8.516 | 1 | 4a <sub>1g</sub> |  | 1.61  | 1.62 | 94.07 | 1.57  |      |
| -8.536 | 2 | 3e <sub>1u</sub> |  |       |      | 92.94 | 4.21  | 1.51 |
| -8.926 | 2 | 3a <sub>2u</sub> |  | 10.17 | 1.48 | 45.46 | 44.62 |      |

**Table S5.** The relative energies ( $\Delta E$ , eV) between two magnetic structures (FM and AFM), and the corresponding local magnetization ( $\mu_B$ ) on actinide elements and the distance ( $\text{\AA}$ ) for An-B ( $R_{\text{An-B}}$ ) and An-An ( $R_{\text{An-An}}$ ) in bulk ThB<sub>6</sub> from PBE calculations with plane-wave basis.

| Species          |     | $\Delta E$ | Magnetization | $R_{\text{An-B}}$ | $R_{\text{An-An}}$ |
|------------------|-----|------------|---------------|-------------------|--------------------|
| ThB <sub>6</sub> | FM  | 0.00       | -             | 3.029             | 4.123              |
|                  | AFM | 0.00       | -             | 3.028             | 4.122              |
| PaB <sub>6</sub> | FM  | 0.00       | 1.001         | 2.996             | 4.081              |
|                  | AFM | 0.46       | 1.001         | 2.985             | 4.065              |
| UB <sub>6</sub>  | FM  | 0.00       | 2.891         | 3.036             | 4.134              |
|                  | AFM | 0.12       | 2.926         | 3.035             | 4.13               |
| NpB <sub>6</sub> | FM  | 0.00       | 4.328         | 3.039             | 4.132              |
|                  | AFM | 4.08       | 4.060         | 3.028             | 4.123              |

|                  |     |       |       |       |       |
|------------------|-----|-------|-------|-------|-------|
| PuB <sub>6</sub> | FM  | 0.00  | 5.770 | 3.056 | 4.158 |
|                  | AFM | 10.75 | 5.424 | 3.029 | 4.126 |
| AmB <sub>6</sub> | FM  | 0.00  | 6.939 | 3.063 | 4.167 |
|                  | AFM | 0.28  | 6.918 | 3.064 | 4.169 |
| CmB <sub>6</sub> | FM  | 0.00  | 6.817 | 3.026 | 4.122 |
|                  | AFM | 10.90 | 6.86  | 3.029 | 4.124 |

**Table S6.** The relative energies ( $\Delta E$ , eV) between two spin state (nonet and 13-state) from CASPT2 calculations with three active spaces, CAS(12e, 12o), CAS(12e, 14o) and CAS(20e, 16o).

| $\Delta E$       | Nonet | 13-state |
|------------------|-------|----------|
| CAS(12e, 12o)PT2 | 0.00  | 3.32     |
| CAS(12e, 14o)PT2 | 0.00  | 4.27     |
| CAS(20e, 16o)PT2 | 0.00  | 4.75     |

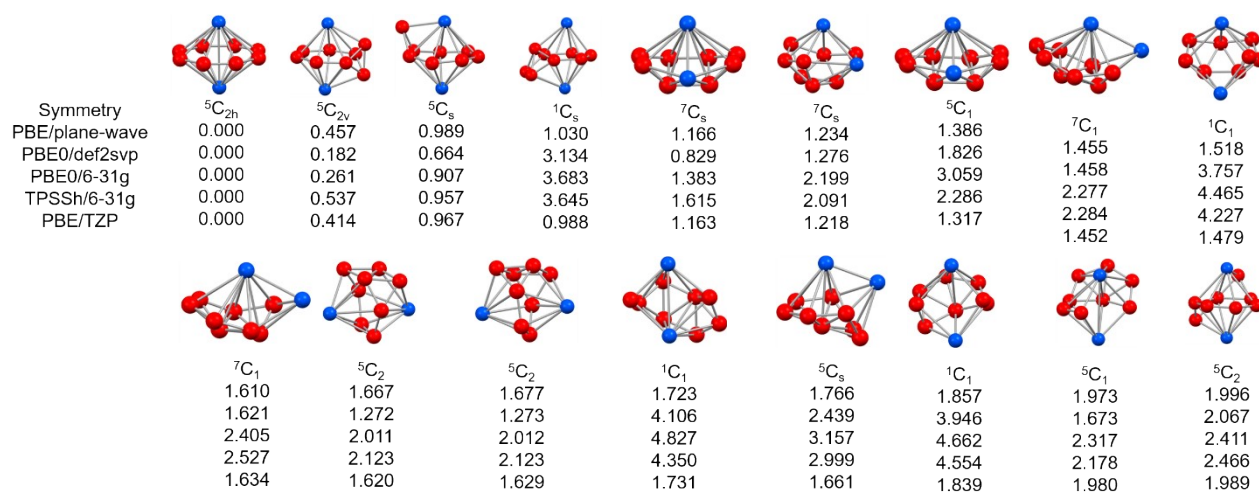

**Figure S1.** The global minimum and low-lying eight isomers of U<sub>2</sub>B<sub>8</sub>. Relative energies for the isomers of U<sub>2</sub>B<sub>8</sub> are given in eV at the five different levels of theory.

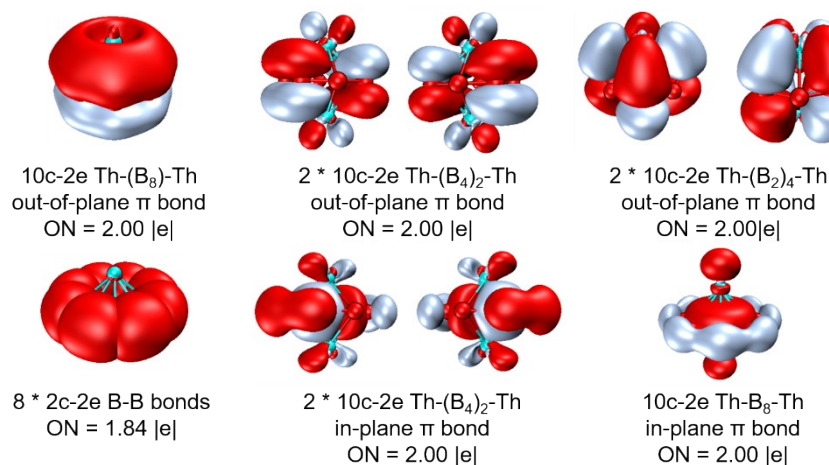

**Figure S2.** AdNDP analysis for Th<sub>2</sub>B<sub>8</sub>. ON denotes the occupation number and is equal to 2.00 |e| in the ideal case.

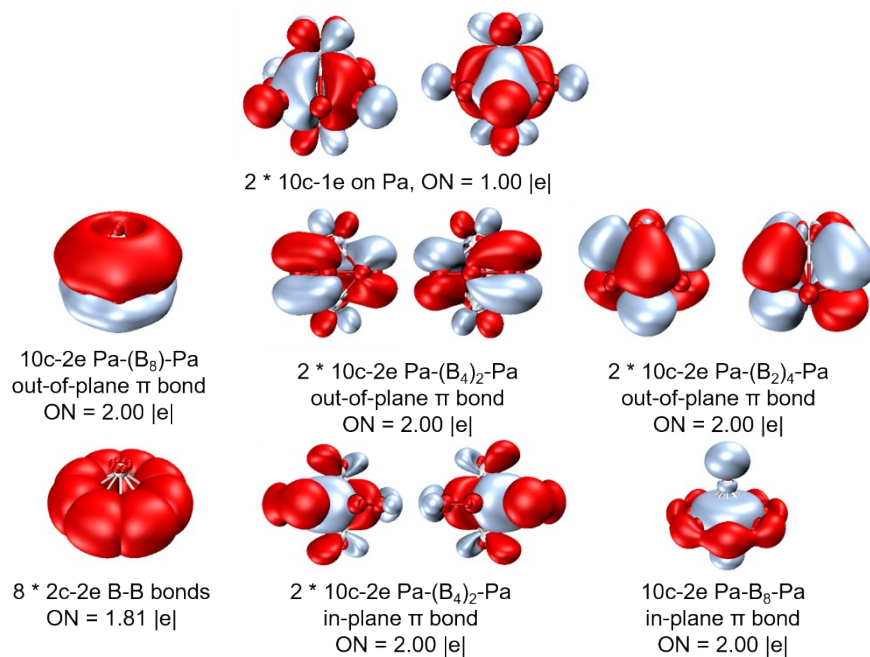

**Figure S3.** AdNDP analysis for Pa<sub>2</sub>B<sub>8</sub>. ON denotes the occupation number and is equal to 2.00 |e| in the ideal case.

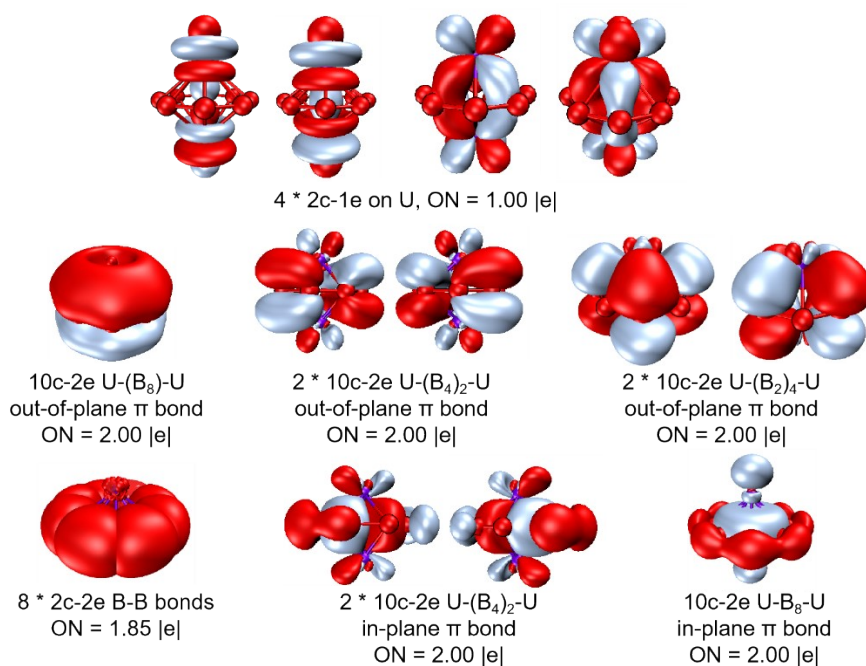

**Figure S4.** AdNDP analysis for U<sub>2</sub>B<sub>8</sub>. ON denotes the occupation number and is equal to 2.00 |e| in the ideal case.

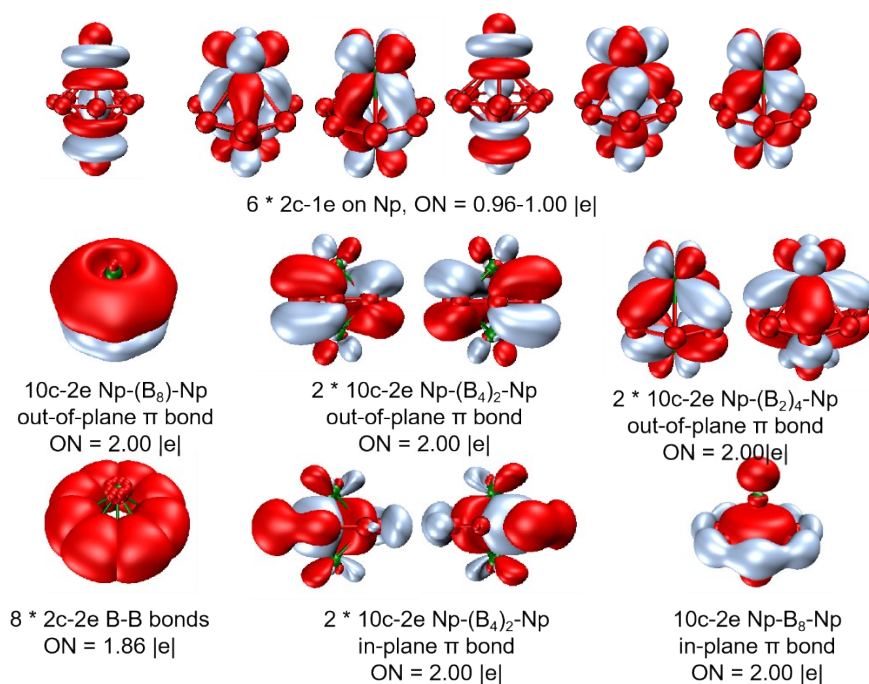

**Figure S5.** AdNDP analysis for Np<sub>2</sub>B<sub>8</sub>. ON denotes the occupation number and is equal to 2.00 |e| in the ideal case.

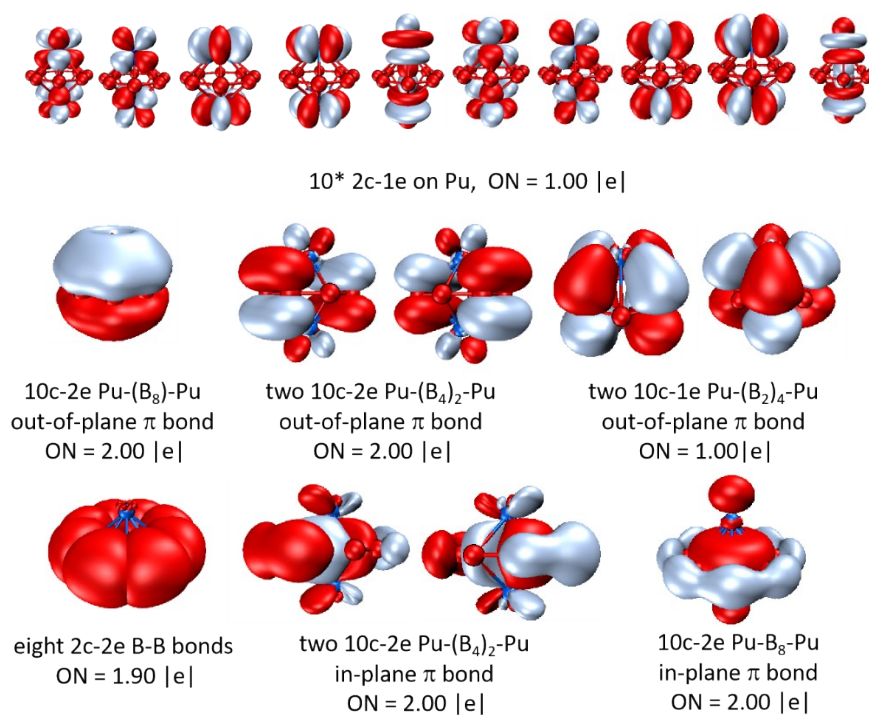

**Figure S6.** AdNDP analysis for Pu<sub>2</sub>B<sub>8</sub>. ON denotes the occupation number and is equal to 2.00 |e| in the ideal case.



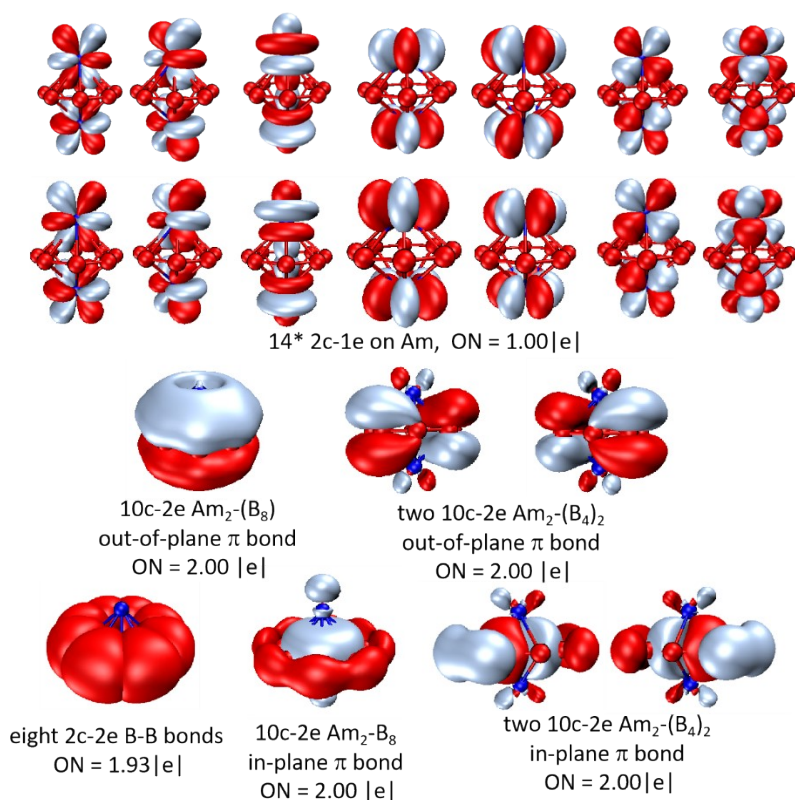

**Figure S7.** AdNDP analysis for  $\text{Am}_2\text{B}_8$ . ON denotes the occupation number and is equal to 2.00 |e| in the ideal case.

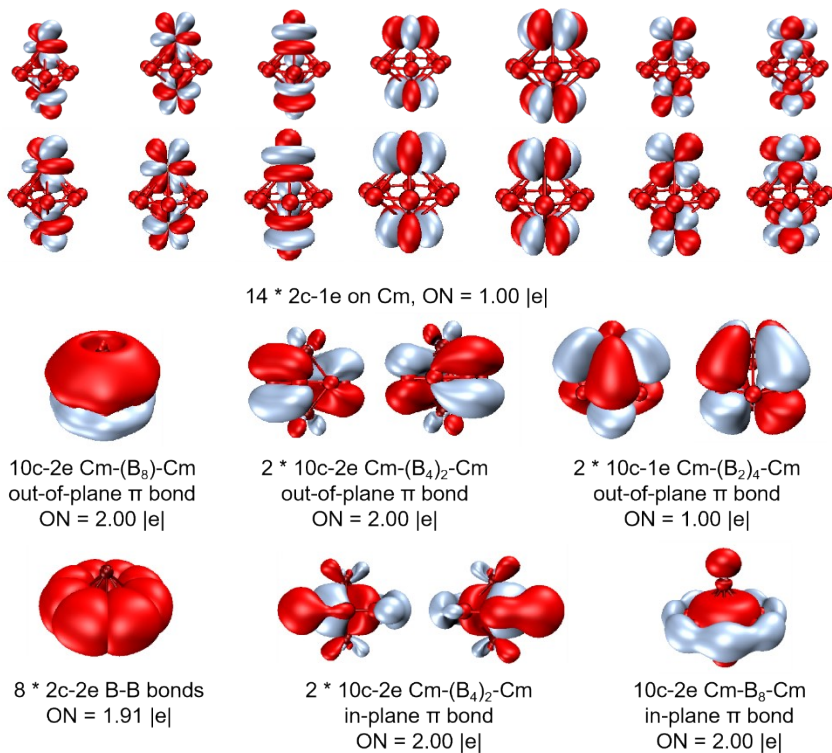

**Figure S8.** AdNDP analysis for  $\text{Cm}_2\text{B}_8$ . ON denotes the occupation number and is equal to 2.00 |e| in the ideal case.

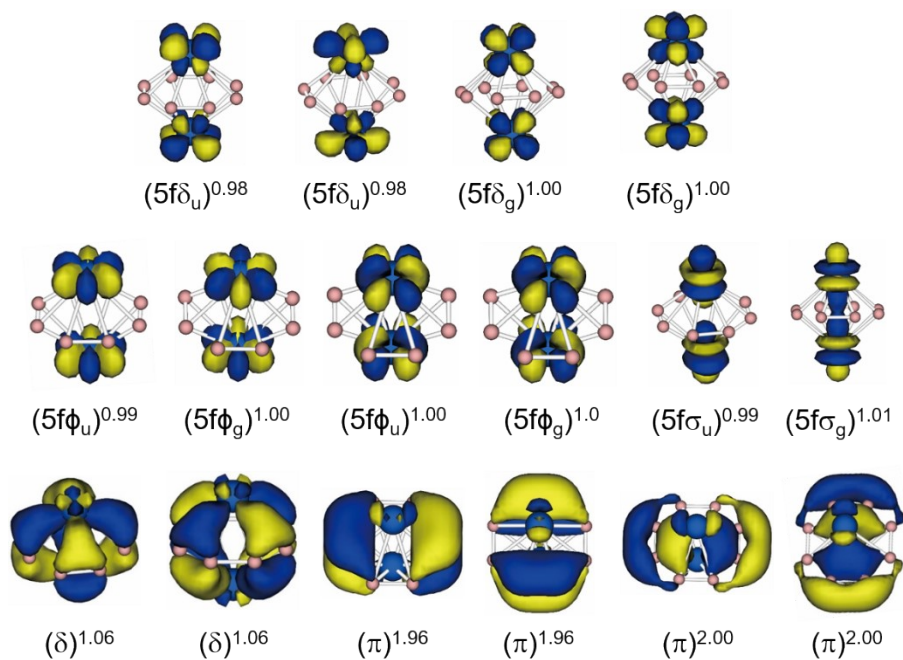

**Figure S9.**  $\text{Pu}_2\text{B}_8$  orbitals predicted by CASSCF (20e, 16o) for the nonet spin state along with the occupation number of the orbitals.

**Table S7.** Coordinates of the global minimum  $\text{U}_2\text{B}_8$  at the PBE/planewave level (in Å) using VASP 5.0 software.

---

ISO0\_0.000\_M4

10

# U2B8

U 11.25655041 11.04792422 9.52260023

U 9.53487249 8.64213338 10.66013157

B 8.77736675 11.05374518 10.20060225

B 12.01405605 8.63631242 9.98212965

B 9.61974923 11.06365033 11.49487227

B 11.17167357 8.62640727 8.68785953

B 10.91393569 10.36156883 11.96700393

B 9.87748711 9.32848877 8.21572787

B 11.90588769 9.35498373 11.34318043

B 8.88553511 10.33507387 8.83955137

ISO1\_0.457\_M4

10

# U2B8

U 10.87226604 10.81347983 9.84300856

U 9.79998870 7.71288924 11.39162432

B 10.80842332 9.83566102 12.09070404

B 9.32470384 10.15324380 11.70002715  
B 10.25298496 8.46787105 8.96732556  
B 9.15257847 9.72673617 8.77073595  
B 11.85470898 9.03947270 11.22047037  
B 11.60423156 8.41814068 9.80383355  
B 8.65941919 8.30075659 9.48317041  
B 8.58452404 9.73825592 10.35548629

## ISO2\_0.989\_M4

10

# U2B8

U 10.37421424 9.73383261 8.03240132  
U 8.66222890 8.75530219 10.93108989  
B 7.94156007 9.29610913 8.59434513  
B 10.05042425 7.53133788 9.24326858  
B 9.66529317 10.96811572 10.12657862  
B 11.08462532 8.45295213 9.93807269  
B 8.44530441 10.66262632 9.12457086  
B 8.69179741 7.92364682 8.57375556  
B 10.88630259 9.94536402 10.50361164  
B 9.84970444 10.46504728 11.71701470

## ISO3\_1.030\_M0

10

# U2B8

U 10.93148904 10.55116745 8.52298888  
U 7.77278992 9.75966262 10.41666020  
B 8.56614950 10.98679118 8.57571482  
B 8.81806067 9.43109858 8.24266426  
B 9.69756774 8.44304903 9.14539629  
B 11.20141446 8.49708381 9.81847836  
B 11.45663552 9.76807293 10.77432397  
B 10.16637450 10.78614765 10.91286356  
B 9.25741119 11.61542447 9.88818351  
B 9.96165006 9.03427167 10.79159997

## ISO4\_1.166\_M6

10

# U2B8

U 7.94398612 8.42297173 10.21643570  
U 8.87258163 10.15232113 8.20853144

B 10.37231614 9.20925759 10.24282916  
B 11.46320636 10.11605597 9.02131797  
B 9.22414083 10.31590723 10.66033976  
B 10.59967848 10.87855007 10.04379728  
B 8.85745824 7.67016543 8.21212235  
B 10.20611493 8.03764351 7.41511818  
B 10.20274333 7.98543582 9.11083081  
B 11.30457563 8.96949422 7.96081985

## ISO5\_1.234\_M6

10

# U2B8

U 10.54866627 9.67971676 10.10086526  
U 8.44603817 9.58731465 11.79614272  
B 9.86676451 7.49711412 9.22662907  
B 8.96836663 9.87380080 8.24163577  
B 8.48102383 10.76146603 9.58470462  
B 9.67567332 7.60069139 10.89449028  
B 10.17425398 8.67669727 8.02298319  
B 8.64276725 8.25021421 8.39040345  
B 7.77391748 9.30616858 9.43414847  
B 8.32131118 7.85800719 10.03422017

## ISO6\_1.386\_M4

10

# U2B8

U 10.50427231 9.86316947 8.55432209  
U 8.87908073 7.91005672 8.81588659  
B 8.38052155 9.91959033 10.07682045  
B 11.36111017 9.24164566 11.04935390  
B 9.47099917 11.34780005 10.44970617  
B 8.52904312 11.35840801 9.20122942  
B 10.74649714 8.04352766 10.22355333  
B 10.68480500 10.63022292 11.14610193  
B 9.64088332 9.15069497 10.86426517  
B 8.02172928 10.02856951 8.44785205

## ISO7\_1.455\_M6

10

# U2B8

U 7.89847321 12.00436673 8.73690965



U 7.79015297 9.50992250 8.07751494  
B 8.60231420 10.30608864 10.44311338  
B 9.83938058 8.01344659 8.48683610  
B 8.31411877 8.75034216 10.67957728  
B 8.87022030 7.65776263 9.70605145  
B 9.84107763 10.71008974 9.39855086  
B 10.34908257 9.49782546 8.19174599  
B 9.75745231 9.08915706 9.82520790  
B 9.75840805 10.99652749 7.78299525

## ISO8\_1.455\_M6

10

# U2B8

U 9.62509830 8.42800278 11.58417460  
U 9.37131832 7.92294456 9.06351922  
B 8.34612166 10.06502396 10.17695137  
B 7.57770250 10.00113068 8.77499474  
B 10.87439123 9.95361448 8.63599102  
B 9.99282353 10.34096223 10.13878509  
B 9.19413001 10.55354697 8.67878313  
B 9.94330904 9.75243773 7.35416598  
B 11.20988242 9.23803269 10.09724281  
B 8.34808880 9.80089072 7.42695854

## ISO9\_1.518\_M0

10

# U2B8

U 10.24778438 10.74603956 9.28601543  
U 8.60391079 8.60668343 7.25563719  
B 8.40237934 10.18205560 10.69595250  
B 10.69830008 8.42323449 8.49020879  
B 8.47533570 10.82667730 7.76357763  
B 7.80669630 10.26573778 9.12246906  
B 9.47538761 8.99506532 10.90683204  
B 8.12734051 8.80946728 9.79197773  
B 9.50252188 7.95850117 9.47197056  
B 10.87003433 8.59947018 10.14873006

## ISO10\_1.518\_M0

10

# U2B8

U 8.43464242 10.92774822 10.96088369  
U 10.87835113 9.48223288 9.13634771  
B 9.27908829 7.71610248 9.38737695  
B 9.23180663 11.23633841 8.48243567  
B 8.81542887 8.54779092 8.05750462  
B 10.19968789 11.64608959 9.70817441  
B 9.29717300 9.94336941 7.40522860  
B 9.22106392 8.62620139 10.79449389  
B 8.10388341 8.85166912 9.64895002  
B 8.08520435 10.07305689 8.54175744

## ISO11\_1.610\_M6

10

# U2B8

U 7.40980654 8.79944302 9.87827370  
U 9.52236808 10.50943765 9.51029238  
B 11.83307597 9.64174339 9.67055658  
B 11.26692719 8.33100647 8.83969304  
B 9.64218012 7.90018570 9.21734956  
B 10.20678644 8.84224768 7.60520972  
B 10.94799514 8.54514651 10.49917452  
B 11.43324672 9.79942403 8.10135813  
B 9.41658349 8.33157499 10.87938861  
B 8.67391031 8.62246405 7.97577427

## ISO12\_1.677\_M4

10

# U2B8

U 9.69200352 8.19373630 10.42318151  
U 8.96503798 11.32326754 8.08950877  
B 10.85599642 10.08444627 9.17476309  
B 8.27539230 9.18791183 8.82286675  
B 10.61165761 11.66889311 9.67111894  
B 9.85058295 9.14629227 8.26897314  
B 9.05641092 10.10375662 11.55359674  
B 8.10855054 10.12140464 10.16821999  
B 10.54637859 10.43981476 10.81017044  
B 9.15908357 11.41504946 10.51336303

## ISO13\_1.677\_M4

10

## # U2B8

U 9.87416284 10.71983680 10.73200874  
U 8.68796451 7.96969492 8.12609807  
B 8.32628412 10.37418278 8.73978835  
B 8.98847275 10.07526587 7.22661219  
B 10.76726686 8.86690094 9.29691314  
B 9.84269521 11.02083408 8.31691788  
B 11.30230839 10.41784277 8.94244527  
B 8.13496750 9.31072485 9.98290485  
B 9.52373122 8.43280224 10.28533137  
B 10.51107660 9.53808065 7.75419854

## ISO14\_1.723\_M0

10

## # U2B8

U 9.15087353 9.93180924 9.51251671  
U 10.82328174 7.86448160 11.24915984  
B 11.33071780 10.70386971 8.35779735  
B 11.34996609 11.22372807 9.82866713  
B 11.03802437 10.20900985 11.06344769  
B 9.04671418 7.61067107 9.82204264  
B 11.82045215 8.06687110 9.11012723  
B 11.83948684 9.63428877 9.65290574  
B 11.05521618 9.14476809 8.05240294  
B 10.21844002 7.87567771 8.72709484

## ISO15\_1.723\_M0

10

## # U2B8

U 8.63488257 8.21530540 10.40747351  
U 8.84625680 10.27265728 7.99697225  
B 9.81334597 10.19152670 11.55175711  
B 11.01985900 9.53679596 8.58218100  
B 8.85048157 10.66261212 10.32555178  
B 8.61916035 7.99235362 8.07402414  
B 11.09241175 8.43515134 9.86553676  
B 10.17965569 8.10872816 8.51404959  
B 10.88871590 9.08356585 11.32814934  
B 10.46977461 10.16858427 10.01401982

## ISO16\_1.766\_M4

10

# U2B8

U 11.14044621 8.99431594 8.47254839  
U 10.33143058 10.97734148 9.53499149  
B 9.26027693 7.72010617 9.43149254  
B 8.97390983 9.91724278 7.74453224  
B 8.70517013 9.74779097 11.09319567  
B 8.82256449 8.28177882 8.03737132  
B 9.87468339 8.76962131 10.57301620  
B 8.33962620 9.17861986 9.42734717  
B 7.76457734 10.61178835 10.19788801  
B 7.93341351 10.74662754 8.65297725

ISO17\_1.857\_M0

10

# U2B8

U 9.48194258 10.93311199 10.76573782  
U 8.65700576 9.87702612 7.54652084  
B 10.62242146 9.60886376 9.10239785  
B 7.90867191 11.31413186 9.16045441  
B 9.74017840 8.25404023 8.79846320  
B 7.35071321 9.93477574 9.78197168  
B 10.22901385 8.56788837 10.35286910  
B 7.64862400 9.15226258 11.16996386  
B 9.03958362 8.52401474 11.45415558  
B 8.43561462 8.53672762 9.81359196

ISO18\_1.973\_M4

10

# U2B8

U 10.09821020 8.63245595 11.27270525  
U 10.93251183 11.49085746 9.88187725  
B 10.46848785 9.17644525 8.70989103  
B 8.92489018 10.81138358 10.81138614  
B 7.78158599 9.73283246 10.56816684  
B 12.12235677 9.82209080 11.03457796  
B 9.01970419 9.91930816 9.33607073  
B 7.93704444 8.52794354 9.60339770  
B 11.81822232 9.31436318 9.59629656  
B 9.16046412 8.30443922 8.67470134

## ISO19\_1.973\_M4

10

# U2B8

U 10.78400785 9.56089269 8.36011868  
U 7.81641249 10.42397208 9.47554121  
B 10.06899559 10.26649890 10.68817735  
B 10.10446803 11.47967214 9.46089471  
B 8.92695593 8.23930242 8.99921090  
B 9.51582054 11.92398712 10.86996029  
B 9.49677123 8.63477514 10.46407993  
B 8.94745663 10.92239723 11.90942826  
B 8.58103504 9.04863585 7.71689063  
B 9.00791657 9.37849734 11.76057026

## ISO20\_1.996\_M4

10

# U2B8

U 11.41979273 10.08719625 9.72763043  
U 7.80432927 9.13692575 9.72763043  
B 9.61206100 9.61206100 8.11831982  
B 9.61206100 9.61206100 11.42762941  
B 9.98600094 8.08796902 10.43354003  
B 9.23812106 11.13615298 10.43354003  
B 10.41466133 11.04948866 11.52851933  
B 8.80946067 8.17463334 11.52851933  
B 10.01089312 8.28533503 8.84926975  
B 9.21322888 10.93878697 8.84926975

## ISO21\_2.047\_M4

10

# U2B8

U 10.17150813 10.19315986 11.08860987  
U 10.24997200 10.47742487 7.35494844  
B 11.89298376 8.96718138 10.29763299  
B 11.03229131 11.63966843 9.31626075  
B 8.40857652 9.06762166 10.22410426  
B 11.83457183 10.21641080 9.17827988  
B 9.46226820 11.69109761 9.28415576  
B 9.32543592 8.78773664 8.92969033  
B 8.58822173 10.31246635 9.11386258  
B 11.01946579 8.74268051 8.95846925

## ISO22\_2.072\_M4

10

# U2B8

U 8.82494629 10.74496473 8.21132804  
U 10.02317189 8.88156829 11.23895015  
B 9.09072843 8.42363337 8.93369347  
B 10.59602680 8.99269082 8.80295869  
B 8.26099406 11.97272842 10.01339907  
B 10.88179667 10.49599776 9.61751762  
B 8.11124456 10.45657283 10.59416883  
B 11.80162214 9.16444465 9.88705935  
B 9.65609025 11.23205462 10.45690577  
B 8.00442090 9.01926872 9.86586471

## ISO23\_2.101\_M6

10

# U2B8

U 9.03395202 8.56409605 11.84095040  
U 8.40590435 7.65010310 9.52024904  
B 9.73043657 10.01844387 10.17210810  
B 9.08944531 9.10732175 7.60108921  
B 10.62349302 8.52881235 9.83709182  
B 10.27580331 8.07267768 8.17512958  
B 10.38757575 9.63617537 8.62012179  
B 8.92011420 10.43391453 8.70319990  
B 7.97180821 9.97049197 9.98726750  
B 7.63270185 9.50942942 8.32475966

## ISO24\_2.136\_M0

10

# U2B8

U 8.94717396 9.32282777 11.15323384  
U 9.24146564 11.51679273 9.00961722  
B 10.46545884 11.34221864 11.23283403  
B 9.30779811 9.15752115 8.35637054  
B 8.94686284 11.66249793 11.35581517  
B 7.80467232 9.56659908 8.97806477  
B 11.15411611 10.40427610 10.19683721  
B 10.75499298 9.22574845 9.23062694  
B 8.29463462 8.01250435 9.06079001  
B 9.84768587 7.86000861 9.25960217

## ISO25\_2.137\_M0

10

# U2B8

U 10.21331327 9.66283544 11.00146061  
U 10.29780862 8.93676487 8.00828439  
B 11.57464543 10.82374405 9.06489213  
B 8.87611618 11.65097851 10.10932725  
B 7.89000854 10.43624199 10.27404561  
B 11.57358085 8.14069584 9.83909124  
B 12.25934927 9.50260912 9.52575585  
B 10.13820092 11.47073137 9.07778503  
B 8.70375880 10.61375574 8.81076124  
B 8.36592742 9.10459667 9.46060464

## ISO26\_2.147\_M6

10

# U2B8

U 9.40596649 7.48703507 8.54973227  
U 10.68891715 9.74992803 7.91416534  
B 9.89750210 9.01535328 10.55887592  
B 9.67334199 10.71379145 10.05413374  
B 8.37924557 9.35694737 10.13840712  
B 8.50504621 10.56593944 8.90527701  
B 11.13686325 10.08407071 10.26555132  
B 11.25793213 8.46502577 9.85500260  
B 7.45951023 9.21010138 8.86148520  
B 8.29099328 9.57880680 7.54998929

## ISO27\_2.195\_M4

10

# U2B8

U 8.18431723 8.17113740 9.75102750  
U 7.65190392 10.30109456 8.63358278  
B 10.58417434 9.16031114 9.99049308  
B 10.16300463 9.92657294 8.44175800  
B 9.95732585 11.09402698 9.55569271  
B 8.81367497 11.49860345 10.55736276  
B 9.53057359 10.00608003 10.89592484  
B 7.90219928 10.21950839 11.04444435  
B 9.28207234 8.76447396 7.67243592

B 10.48928345 8.28803414 8.68428115

ISO28\_2.195\_M4

10

# U2B8

U 8.01376592 10.47021188 8.71197801

U 9.40407534 9.99011074 10.68952644

B 10.34883240 11.16075148 8.78827417

B 11.42816108 9.97251090 9.15386056

B 8.00034455 7.96859448 8.22464988

B 9.33331930 8.51888302 7.59754086

B 9.33484106 7.88298157 9.25888419

B 10.81578547 8.52567392 9.06191642

B 7.84882260 8.32171413 9.82291881

B 10.32302598 9.77514938 7.89432583

ISO29\_2.212\_M4

10

# U2B8

U 8.70789660 9.14610850 7.46826912

U 9.60945880 11.84123433 9.02736937

B 7.23360774 10.76621186 8.73498512

B 6.94613649 9.26378615 9.33056499

B 10.72509062 9.58923686 9.02840047

B 8.11708761 8.49221373 10.01286067

B 9.56250379 9.16635389 10.02246877

B 8.14693949 10.17374047 10.05825124

B 10.75534805 10.29617076 7.65665745

B 7.98575601 11.38692395 7.48315450

ISO30\_2.214\_M4

10

# U2B8

U 8.12736092 8.58499475 10.19531698

U 11.30881494 11.11196947 9.17476822

B 10.70147270 8.67649009 9.84834371

B 10.90151299 9.08138829 8.15012353

B 10.04067196 8.82056415 11.47014667

B 11.27085046 9.79804385 11.07533018

B 8.88042732 10.84680319 9.54614581

B 9.67145082 8.10381564 8.54481438



B 9.66912593 10.39151015 10.87864524  
B 9.35953176 9.79038502 8.42407619

## ISO31\_2.232\_M4

10

# U2B8

U 9.37781944 9.71937654 7.71229157  
U 10.71223614 8.04099706 8.89838374  
B 9.15124624 9.79513480 10.23513009  
B 11.91345312 9.95176216 10.09029528  
B 9.32444282 7.05437883 10.44134688  
B 11.51655609 10.35566195 8.53881210  
B 8.48943599 8.38635562 9.84762619  
B 9.51035836 8.44312387 11.23562944  
B 10.43070040 10.62767271 9.73431385  
B 10.74174431 9.53976857 11.09681838

## ISO32\_2.232\_M4

10

# U2B8

U 10.06156081 10.84199783 10.22941738  
U 10.33616707 8.45923404 10.73146151  
B 10.18862854 7.84323434 8.14605264  
B 11.93123132 9.69868222 9.29906587  
B 10.68648751 9.53992220 8.24641068  
B 8.17596839 9.01507215 9.73940566  
B 8.30129219 7.45859659 10.35938724  
B 11.67763520 8.23842354 8.57104453  
B 9.11597622 9.28654476 8.46901058  
B 8.68346376 7.65707923 8.80723741

## ISO33\_2.236\_M8

10

# U2B8

U 9.91529293 10.25357427 8.94763874  
U 9.29798867 10.25357427 11.69133626  
B 10.69167195 8.23026130 11.06925871  
B 8.52160975 8.23026130 9.56971619  
B 9.13680897 7.71897370 11.12327036  
B 10.07647263 7.71897370 9.51570454  
B 7.69096525 9.61339481 9.90453204

B 11.52231645 9.61339481 10.73444286  
B 7.70367585 8.43695031 11.03761345  
B 11.50960575 8.43695031 9.60136145

## ISO34\_2.256\_M6

10

# U2B8

U 10.32161862 10.28968683 7.40632867  
U 10.64134975 8.55421209 9.63510862  
B 8.53179817 9.44471838 8.82511519  
B 8.74780186 10.98044506 9.13819388  
B 11.47708783 10.85599898 10.83364437  
B 10.17411321 11.26766125 9.86383501  
B 8.71807609 9.99403800 10.48313543  
B 9.37210703 8.87667100 11.49262654  
B 11.70484184 10.85017482 9.27773327  
B 10.17901291 10.25972459 11.50972141

## ISO35\_2.257\_M6

10

# U2B8

U 10.41054898 11.34326743 9.33742174  
U 9.10152630 9.56589304 11.13301591  
B 11.07662213 9.05957365 9.59042013  
B 8.74497266 10.08184672 8.07605906  
B 8.72529592 7.59978026 9.51278778  
B 7.48437998 8.17652645 10.34350100  
B 7.79934326 9.06455415 8.99962966  
B 10.30187048 7.69140849 9.56051112  
B 9.76539520 8.90196014 8.53347922  
B 8.04341430 10.77678236 9.31253838

## ISO36\_2.272\_M4

10

# U2B8

U 12.26677832 9.29115715 8.28496242  
U 10.11484249 7.89568915 8.27761472  
B 10.16231454 10.18966816 7.71599125  
B 10.10488703 8.27705209 10.86353834  
B 8.65785144 8.49582634 10.25598640  
B 10.92736804 9.68095047 10.38421014

B 7.93027427 8.60585098 8.87632283  
B 8.82500446 9.94409234 8.79571776  
B 11.59104691 8.19482253 10.26578125  
B 10.32224980 10.63963408 9.22556010

## ISO37\_2.281\_M6

10

# U2B8

U 11.46295336 9.12286302 9.49086970  
U 9.81299054 9.82076742 11.56173943  
B 7.80982616 8.75269212 10.87595069  
B 9.96069583 7.84321277 8.17550049  
B 9.29485508 9.37893269 8.31961076  
B 8.37057440 7.74981733 8.25257306  
B 7.41486552 8.15202418 9.45293122  
B 9.16230204 8.12896642 9.80320346  
B 9.59585098 10.64956596 9.30015787  
B 8.22982170 9.82739290 9.65419171

## ISO38\_2.289\_M0

10

# U2B8

U 10.15641365 10.38615100 10.92558648  
U 8.43572385 10.38615100 7.00828912  
B 9.63333382 12.36658401 9.73449467  
B 8.95880358 12.36658401 8.19938093  
B 9.63333382 8.40571799 9.73449467  
B 8.95880358 8.40571799 8.19938093  
B 10.15446472 11.19728740 8.58978979  
B 8.43767268 11.19728740 9.34408581  
B 10.15446472 9.57501460 8.58978979  
B 8.43767268 9.57501460 9.34408581

## ISO39\_2.296\_M2

10

# U2B8

U 9.69420720 8.87774285 10.66741940  
U 11.24071041 8.21627936 8.99840701  
B 10.32184415 10.34050823 7.82711674  
B 11.90978597 10.15516154 8.05426934  
B 8.94629183 7.75451688 8.68669260

B 9.34462208 10.93009430 9.19305047  
B 7.71748142 8.72755621 9.08340815  
B 10.95461130 10.60507529 9.39981455  
B 8.98120998 9.42389157 8.17680328  
B 7.91822116 10.25902178 9.34450355

## ISO40\_2.296\_M2

10

# U2B8

U 11.16215610 10.59931640 9.97259440  
U 8.84658638 10.73709976 10.45531697  
B 8.21446185 9.24966954 8.50006684  
B 11.87656848 8.81496621 11.15639098  
B 10.70848313 8.06867277 10.32867301  
B 9.03389664 8.23410016 10.90992505  
B 7.93719821 8.38679387 9.77796930  
B 9.60321637 10.05075108 8.28755965  
B 9.61169493 8.54816115 9.17685262  
B 10.25763652 9.07176746 11.64527578

## ISO41\_2.297\_M4

10

# U2B8

U 9.07511897 7.49245421 9.83158008  
U 9.33382792 9.60770440 11.11481430  
B 10.65611651 9.81165975 7.64538032  
B 7.57564810 9.17322407 9.43604225  
B 9.14861727 11.47629506 9.21503186  
B 10.06440497 8.37075504 7.84590322  
B 10.56501940 10.81623964 8.91599793  
B 10.72265348 9.16372777 9.30155190  
B 7.79445132 10.74024691 9.36941616  
B 9.06923136 9.71931286 8.57755888

## ISO42\_2.310\_M4

10

# U2B8

U 9.86442024 10.38069316 7.37739800  
U 8.85890727 7.73060708 9.29047757  
B 11.01925508 8.32294778 8.23965617  
B 8.55187927 9.94793178 10.33001363

B 7.83612845 9.93430690 8.84480180  
B 10.99841390 9.13658489 9.62323853  
B 8.76365170 11.22928842 9.25146382  
B 9.90155972 8.03142868 7.20162435  
B 10.10274078 10.47058616 9.92431910  
B 9.88262361 9.08313176 10.87600752

## ISO43\_2.311\_M0

10

# U2B8

U 10.58836865 8.62739094 8.14220381  
U 9.75289083 11.08685656 10.50274841  
B 9.18201464 7.47439121 9.65647850  
B 8.66521452 10.14260178 8.46688348  
B 9.08655221 8.66964564 10.86251228  
B 10.53996798 7.88045696 10.52419137  
B 8.33514090 8.88682057 9.41493074  
B 11.49450811 9.22378163 10.38644665  
B 10.46723450 9.15483546 11.64827902  
B 9.99867586 10.90400055 8.17456542

## ISO44\_2.311\_M4

10

# U2B8

U 8.83087043 7.75987536 7.97368096  
U 10.21469360 8.37342502 9.91902270  
B 8.44732722 9.50281084 11.35864968  
B 9.97857650 9.83943559 7.97068900  
B 8.48603811 10.02324055 8.62795441  
B 9.81448033 10.59984291 10.98851669  
B 8.37424623 10.57194312 10.13317639  
B 9.92957894 9.26087028 11.97663673  
B 7.77584535 8.98204084 9.79678180  
B 9.92020809 10.79627169 9.32443363

## ISO45\_2.345\_M6

10

# U2B8

U 10.07751544 10.96164969 8.24016820  
U 7.90922734 9.62116967 9.61176454  
B 11.10523077 7.44519975 9.34586232

B 9.08177672 8.77557029 7.80160834  
B 9.55186277 7.63158917 9.04420725  
B 11.43957886 10.16325915 10.21949446  
B 9.90747730 10.44513391 10.61171212  
B 10.67827771 8.63186362 8.12217961  
B 11.87776263 8.87192050 9.33715623  
B 10.25239445 8.90483134 10.05332115

## ISO46\_2.346\_M6

10

# U2B8

U 7.89393865 10.32183329 10.07792508  
U 9.18814145 7.82570195 9.39413731  
B 9.65457967 11.06438952 8.25177255  
B 8.58819314 9.70461473 7.95545442  
B 10.19753433 9.42113133 7.89819507  
B 11.63887732 9.40649393 8.84301312  
B 11.22663276 10.82053417 8.16194154  
B 9.88594302 9.45930213 11.05809948  
B 11.24005907 8.95962672 10.35284888  
B 10.35195169 10.29626304 9.68465806

## ISO47\_2.357\_M2

10

# U2B8

U 7.56518317 8.51364019 9.34364317  
U 8.27117026 10.54757586 8.38203629  
B 9.81784147 12.05363473 9.80401014  
B 10.53947248 10.68221513 9.57829324  
B 8.75032267 9.40854100 11.30035900  
B 9.23286647 7.96933174 10.69620038  
B 9.38345331 10.88166230 10.89721768  
B 8.28362572 12.02147771 10.27719683  
B 7.62549936 10.56964753 10.71572538  
B 9.92408708 9.18270421 9.77313699

## ISO48\_2.386\_M4

10

# U2B8

U 9.40362129 10.43893818 9.24396230  
U 7.72334676 8.54859329 8.77885964

B 9.09570597 8.74448612 10.87271812  
B 11.67204631 10.55788858 8.77074813  
B 9.47285170 7.42142737 10.02441255  
B 9.58807236 8.83138185 7.44883110  
B 11.77572101 9.35190655 9.74943293  
B 10.15843648 7.83628888 8.60695374  
B 10.71714595 8.40814104 10.47837019  
B 11.11051117 9.17507394 8.05264320

## ISO49\_2.386\_M4

10

# U2B8

U 10.85289969 11.23580022 10.25465213  
U 8.69731880 10.00704230 9.57769215  
B 9.91874868 8.91900929 7.77366223  
B 9.33799045 7.53861535 8.82656933  
B 11.24400875 9.13817899 8.86941483  
B 10.26041405 7.84599545 10.09043290  
B 11.47478883 8.90170352 10.46382376  
B 10.07818128 9.06896814 11.26032308  
B 10.57591122 10.41959901 8.11457330  
B 8.36269626 8.38275683 7.95492758

## ISO50\_2.389\_M0

10

# U2B8

U 8.46099258 9.24877447 10.90171600  
U 10.18145772 12.04933720 10.48289851  
B 8.91399099 10.61002301 8.76448127  
B 10.39264916 10.26628438 11.89331813  
B 8.08669366 11.38020622 9.86871766  
B 10.47140091 8.43322809 9.51437774  
B 9.03316722 7.65275750 9.37765207  
B 10.99252556 9.60838254 10.58792971  
B 10.48404595 10.06446605 9.04653940  
B 9.28875044 9.00310494 8.47790481

## ISO51\_2.400\_M2

10

# U2B8

U 10.00886390 7.83947827 10.60925559

U 10.00886390 11.45011547 9.61281854  
B 12.16032722 8.49809246 10.42765555  
B 8.58559021 9.85332616 10.96074266  
B 11.43213749 9.85332616 10.96074266  
B 7.85740048 8.49809246 10.42765555  
B 10.00886390 10.20977323 11.62990587  
B 8.58552203 9.38906610 9.27549661  
B 11.43220567 9.38906610 9.27549661  
B 10.00886390 9.35041810 8.51830725

## ISO52\_2.407\_M0

10

# U2B8

U 8.62010176 8.47690075 7.98137159  
U 10.54851166 10.59528603 9.79131545  
B 8.06833273 10.30668280 9.59974381  
B 9.23995586 7.66661397 11.44124988  
B 8.55113719 7.34097649 10.04287184  
B 8.59207599 10.94866729 8.29043750  
B 8.56061854 9.09281789 10.49631982  
B 9.87578216 10.42475380 7.53564899  
B 10.07948239 9.01932979 11.47708128  
B 10.03174123 8.24915859 9.91579023

## ISO53\_2.416\_M4

10

# U2B8

U 11.19175980 9.97319955 11.47342746  
U 10.26424807 7.76151991 9.86851930  
B 12.02200193 10.42498574 9.24150879  
B 11.49640171 9.17688323 8.33486095  
B 8.60490270 9.49623675 11.02890095  
B 9.14972416 10.17841295 9.77826075  
B 12.46613155 8.89898203 9.62014027  
B 10.40737478 10.32422107 8.85160992  
B 9.11770465 8.49181487 12.11680178  
B 10.49984224 7.83591840 12.22667723

## ISO54\_2.423\_M2

10

# U2B8



U 8.92185625 7.90334926 9.88166542  
U 7.96194782 7.61167332 12.00808901  
B 10.88246833 9.22098980 10.75789016  
B 9.72050016 9.91844141 11.77230192  
B 8.42412986 10.06132209 9.29598443  
B 9.33568275 9.08008255 13.18673063  
B 9.86008428 10.22876053 10.05017176  
B 8.22447753 10.02012880 12.51918400  
B 8.14446639 10.18978792 10.89699660  
B 10.29947643 8.30027981 11.95876767

## ISO55\_2.433\_M2

10

# U2B8

U 11.20953247 9.36891755 9.87563315  
U 10.56606362 8.22059021 7.92727364  
B 9.11899651 8.74324254 11.11447587  
B 8.90990891 10.28579803 10.27581617  
B 9.07366079 10.10172972 8.60029020  
B 9.89924003 10.10287619 11.55714144  
B 9.42697818 7.48705781 10.02223630  
B 8.41385189 7.42354639 8.68902639  
B 8.22430329 8.82289439 7.92805755  
B 8.34660750 8.82328967 9.58902829

## ISO56\_2.441\_M4

10

# U2B8

U 9.49329552 8.28245407 11.36314631  
U 8.61660475 9.09706510 8.82760778  
B 8.53114773 10.14757007 12.49683477  
B 8.16565882 10.34808353 10.85001515  
B 10.95999562 9.60467476 9.85366670  
B 10.96407053 10.36295396 11.30457868  
B 9.48455252 11.13192608 11.65160357  
B 9.70807433 10.72341454 10.06557426  
B 10.59391681 8.13076619 9.28670977  
B 10.18018186 10.14043850 12.74378351

## ISO57\_2.442\_M0

10

## # U2B8

U 8.09851222 8.56078377 8.22649777  
U 10.39637706 8.02489525 8.34850966  
B 8.10400846 10.76892346 8.46153237  
B 11.88764211 9.50574370 9.81076933  
B 9.27671805 8.68841846 10.38803039  
B 9.70029823 10.40378300 8.09455935  
B 10.90561995 8.50938708 10.62328268  
B 8.81710433 10.27133874 9.84320320  
B 11.22182016 10.40935869 8.71716024  
B 10.39691374 10.07047645 10.26111982

## ISO58\_2.453\_M4

10

## # U2B8

U 9.80745580 11.48968180 8.25627334  
U 9.71312687 9.21799186 10.15184152  
B 11.20000451 11.09138001 10.15962835  
B 8.47485878 11.61543706 10.65519438  
B 10.06047017 9.15887303 7.78611239  
B 7.59087047 11.56359236 9.26136550  
B 7.53715822 10.29876325 10.31767187  
B 10.03196817 11.75194236 10.89437081  
B 7.53131276 10.01510688 8.69104605  
B 8.53125776 9.20726228 7.77011230

## ISO59\_2.457\_M6

10

## # U2B8

U 11.25404220 10.95299922 9.63229675  
U 10.69056190 9.42903177 11.67406165  
B 9.77976537 8.22150081 9.66938884  
B 9.08757592 9.82817815 9.04996243  
B 9.08376043 10.67950172 10.49049082  
B 8.03189362 8.35009843 9.20948554  
B 11.40729426 8.60229945 9.59407802  
B 10.47557188 9.02494840 8.18994054  
B 8.44423670 9.06483325 10.57386791  
B 9.04405633 8.34751110 8.00562509

## ISO60\_2.457\_M6

10

# U2B8

U 7.90496430 7.62206042 10.43305921  
U 9.00846519 8.63241292 8.29363170  
B 11.26272428 10.01785348 10.99903821  
B 8.01214849 9.93100443 9.97955050  
B 8.61101198 9.75094417 11.60106757  
B 10.04925559 10.34865059 11.94290300  
B 10.03697354 8.68655142 11.22125253  
B 10.21400405 7.55168760 10.00420936  
B 11.03490115 9.06147498 9.74331565  
B 9.65751814 10.16845659 10.17037737

ISO61\_2.472\_M2

10

# U2B8

U 12.32730390 9.39145134 9.53795849  
U 10.16913231 8.74158423 8.73210858  
B 9.61329739 7.86211884 11.16634567  
B 8.29258714 7.84261146 10.29410364  
B 10.33891293 9.49000307 11.16524029  
B 7.95357981 9.62149491 9.77227383  
B 11.16363232 8.04990420 10.96937013  
B 7.75226123 8.33102506 8.90817654  
B 10.63968265 10.79337623 10.16318873  
B 9.10669152 10.51480575 10.38692159

ISO62\_2.482\_M4

10

# U2B8

U 11.13784963 11.17359728 9.36051980  
U 8.03630433 8.82208626 9.36051980  
B 9.88827881 9.60243116 7.84220464  
B 9.88827881 9.60243116 10.87883486  
B 10.05002523 8.03491728 10.24083984  
B 11.35314182 9.02222349 10.24071347  
B 8.97887515 10.80014630 10.18894589  
B 10.05002523 8.03491728 8.48019966  
B 11.35314182 9.02222349 8.48032603  
B 8.97887515 10.80014630 8.53209361

## ISO63\_2.511\_M6

10

# U2B8

U 9.66208229 10.64302608 9.87563862

U 7.86686759 8.50406694 9.87794442

B 9.66241276 7.93803708 11.34873581

B 11.01400477 8.99052766 11.23058647

B 9.48683030 9.42932700 11.88287929

B 9.65263136 7.93756523 8.39202806

B 11.00165603 8.99465631 8.50257101

B 9.46687420 9.43132377 7.86770554

B 10.41732236 7.96134028 9.86808242

B 11.80236123 9.09640855 9.86333054

## ISO64\_2.516\_M0

10

# U2B8

U 9.91576221 10.22584449 7.60248134

U 10.16804129 7.89969453 10.30933584

B 7.87898136 9.93567688 8.68761431

B 8.85317670 9.57890371 11.41279870

B 10.38706215 11.28925352 9.61686353

B 10.24152646 10.30550913 10.97916234

B 7.97347963 9.08175013 10.13886820

B 8.53923784 8.43842884 8.67705388

B 11.25950269 9.90633047 9.68476388

B 8.85986668 10.56765150 9.95460569

## ISO65\_2.516\_M2

10

# U2B8

U 9.59572836 12.00982814 8.57905480

U 8.50043029 9.89148418 8.41643586

B 10.94082202 10.21485270 8.92763530

B 10.63241141 8.74293668 9.46943257

B 10.09665690 10.20044229 10.37100713

B 9.60452434 7.53948541 9.30460697

B 8.63668656 9.85032761 11.23436562

B 9.20456352 8.52958130 10.59125891

B 8.77830697 11.26418509 10.60438559

B 8.07860392 7.81144610 9.38660826

## ISO66\_2.518\_M6

10

# U2B8

U 10.85955540 11.04380699 10.34969225

U 9.26976702 10.05292770 12.49326227

B 9.98390931 8.76289849 10.55792824

B 8.51380141 8.18082275 11.14188234

B 8.28280320 9.61103917 10.24464457

B 9.60854043 9.12172914 8.75737885

B 8.41786806 11.20092456 10.60487995

B 8.77202353 8.02292081 9.57256326

B 10.20470826 10.54225669 8.24442999

B 8.80400187 10.79878920 9.07250130

## ISO67\_2.541\_M0

10

# U2B8

U 10.78298860 10.07272443 11.81212969

U 7.63580888 8.26263359 10.02333555

B 10.77428084 10.76540802 9.61475936

B 9.83961362 8.15033324 10.83830319

B 8.66654097 9.55250634 8.41633388

B 8.88126880 8.53282336 12.13745664

B 9.90694960 10.52127507 8.32070881

B 8.46662208 9.96748382 11.41525045

B 9.01315150 10.48171663 9.93327945

B 10.05130132 9.10781492 9.49715358

## ISO68\_2.568\_M2

10

# U2B8

U 8.58349899 7.76236027 11.29146290

U 9.13456398 8.82259733 9.24324665

B 10.73977136 8.50131065 11.27294393

B 11.43382383 9.77148281 10.69188651

B 9.87728297 10.00280322 11.36742158

B 10.77423234 11.05998956 10.09836760

B 8.90628552 11.11017378 10.25913370

B 8.59784781 11.00492638 8.52555254

B 8.22289920 9.99989540 11.21692972

B 9.85276181 11.75370440 9.01274386

## ISO69\_2.581\_M4

10

# U2B8

U 10.47161897 10.48112239 11.09640053  
U 10.42872926 10.74292702 8.17243904  
B 12.27268535 10.30681552 9.58092949  
B 9.03445302 8.79091641 9.49007031  
B 10.39352847 8.22405602 10.24167606  
B 8.26484108 10.14745501 9.62410811  
B 10.37042494 8.36908904 8.61258718  
B 9.91989377 12.39770072 9.80227118  
B 11.72697002 8.82963626 9.45563449  
B 8.56066241 11.66864202 9.75762831

## ISO70\_2.585\_M2

10

# U2B8

U 10.44580145 9.59949392 10.88914133  
U 10.86313825 11.87976414 11.27234704  
B 8.79461492 11.41073978 10.51667918  
B 10.00372000 8.52927520 8.48326858  
B 10.13815323 11.38553020 9.19844758  
B 9.96334302 10.07460111 8.28669162  
B 8.02929646 8.56609490 10.41846703  
B 8.55686225 9.25895236 8.96839029  
B 7.86261091 10.11347277 10.34580674  
B 9.15803432 7.80215562 9.60925760

## ISO71\_2.586\_M2

10

# U2B8

U 11.25225023 9.90392472 8.25555812  
U 9.64729683 10.69856171 10.86074172  
B 9.68356042 8.14873830 11.17889130  
B 11.00521020 8.35984301 10.12182189  
B 9.66193395 9.11089805 12.46361881  
B 11.87523694 9.72971812 10.51425569  
B 9.46809985 8.44737632 9.52169659  
B 8.83812999 9.61674473 8.67010222  
B 11.10908417 8.87815276 11.73041940

B 9.23769370 11.11149047 8.54909937

ISO72\_2.591\_M4

10

# U2B8

U 8.43060895 8.62586523 10.19008750

U 10.75194656 10.99871932 10.62875184

B 10.56260267 9.03014405 9.09959987

B 11.54130321 10.31028531 8.48998334

B 9.45929445 8.83579531 7.68601389

B 10.92879852 9.34541374 7.36997232

B 8.24287879 9.80130631 8.20806887

B 9.79040016 10.50088913 8.34795092

B 8.58362614 10.92675525 9.42226247

B 8.51369985 10.73691316 11.03355307

ISO73\_2.591\_M4

10

# U2B8

U 9.87768192 8.03613015 10.58818259

U 10.94473962 10.52237838 8.72580313

B 8.65371126 10.82090349 8.11212393

B 9.92989367 10.41268979 10.93676038

B 7.35027066 10.14257348 8.72457977

B 8.47125751 9.79207420 11.29065098

B 7.59709214 9.22442020 10.00246758

B 8.79135910 9.11283215 8.59957079

B 10.26190927 8.41517338 8.38725261

B 8.70948495 10.60250536 9.82414734

ISO74\_2.600\_M4

10

# U2B8

U 10.31350556 9.45941805 10.97572072

U 9.67913430 7.55525325 9.58807512

B 8.22980047 10.74437982 9.75786402

B 8.09119078 9.15574268 9.75907459

B 12.26240604 10.73581119 10.29505438

B 11.88204375 9.97547176 8.97231937

B 9.51716674 11.52282106 9.43739716

B 9.19044154 9.86919205 8.67988541

B 11.09607329 11.55247320 9.65378622  
B 10.68541574 9.14029943 8.33173221

## ISO75\_2.610\_M0

10

# U2B8

U 11.26700617 10.81470713 10.97064233  
U 9.82688312 8.01350342 9.22649679  
B 8.25861325 8.67564091 10.75844809  
B 8.76471188 10.23480772 10.28178929  
B 9.31213882 11.70322529 9.74106732  
B 9.51187571 10.40285096 8.70723234  
B 10.57431182 11.66837903 8.78274731  
B 11.87739106 9.09341828 9.52858042  
B 9.62504770 9.21478503 11.37995375  
B 11.14793626 10.12070524 8.53511157

## ISO76\_2.610\_M0

10

# U2B8

U 8.08082980 8.77299857 11.24283494  
U 10.50337503 11.09251897 9.93000230  
B 9.48898219 7.53765292 9.92511299  
B 9.21494178 10.26977415 7.98368178  
B 8.85542367 10.95462833 11.56752168  
B 9.38925791 8.90411239 8.90766768  
B 10.37802036 8.80094753 10.32185647  
B 7.98950727 9.94233220 9.07513914  
B 7.98702781 11.14612254 10.23194734  
B 8.44472659 11.47798770 8.66162197

## ISO77\_2.612\_M2

10

# U2B8

U 8.52731230 8.51064090 11.77333385  
U 7.62560909 8.61426298 9.59936417  
B 9.24574680 10.39174857 10.25907203  
B 9.09438076 10.58530124 8.68751133  
B 10.26805541 7.86089959 10.00719452  
B 8.45831752 7.85990652 7.58454972  
B 10.46114089 9.29810855 10.77994865



B 9.19268712 9.32208351 7.71862304  
B 10.22766170 9.38391209 9.15271295  
B 9.76872870 7.70984486 8.47677354

## ISO78\_2.626\_M0

10

# U2B8

U 11.26947507 10.92554864 9.94066995  
U 7.60971309 8.50449616 9.12183617  
B 11.04891223 7.44767633 9.04238205  
B 9.47911647 9.27415986 10.65890062  
B 11.92123317 8.84940555 9.09932509  
B 10.99501440 8.57838071 10.50182403  
B 9.06747460 10.34917077 9.31969918  
B 9.48486625 7.23841486 8.55378048  
B 10.06685386 8.95970364 8.96222170  
B 9.62286396 7.67090167 10.19477562

## ISO79\_2.633\_M4

10

# U2B8

U 8.89476024 11.30190008 10.42824673  
U 10.40086470 9.18430140 10.21822118  
B 10.50969149 10.93238522 8.65916706  
B 7.83560043 11.16601103 7.93526176  
B 9.30076550 11.65758183 7.89997735  
B 7.39229340 9.93230085 8.81091998  
B 7.92107148 9.21165525 10.16769151  
B 8.33657332 8.49146133 8.67141581  
B 9.82387442 8.15916815 8.32276157  
B 9.16281192 9.94681456 8.14470426

## ISO80\_2.643\_M4

10

# U2B8

U 8.08839186 7.92264960 10.21645930  
U 10.62355146 9.38587540 10.21645930  
B 8.32970694 10.43259771 9.41873968  
B 8.32970694 10.43259771 11.01417892  
B 8.08791177 9.23708943 12.17961915  
B 9.50886747 8.38942571 12.20897429

B 9.48564337 10.04378186 12.17971447  
B 8.08791177 9.23708943 8.25329935  
B 9.50886747 8.38942571 8.22394421  
B 9.48564337 10.04378186 8.25320403

## ISO81\_2.651\_M2

10

# U2B8

U 8.85988458 7.79770208 9.37474314  
U 9.99894067 8.66640537 11.31937151  
B 11.10418778 8.55290993 9.16374221  
B 10.09834671 10.90959188 10.76708864  
B 8.68014251 8.99544314 7.46582369  
B 9.70813139 11.03525991 9.19810253  
B 11.06364576 10.10208960 9.61278785  
B 8.56064748 10.26750857 10.19227695  
B 10.12762237 9.59039334 8.18280547  
B 8.47042256 10.20658278 8.45757582

## ISO82\_2.656\_M4

10

# U2B8

U 10.55815158 9.78558550 8.70950257  
U 9.86633437 8.25064956 10.65829076  
B 8.80898341 11.10716014 8.54232621  
B 7.49047032 8.33016578 9.80089036  
B 7.96190377 9.76798479 9.05655645  
B 8.57637869 8.25809672 8.62745422  
B 10.08118268 10.61370346 11.02698585  
B 8.69629557 10.22304185 11.72748526  
B 7.58634462 9.43205740 10.92902292  
B 8.64344548 10.86961152 10.17252231

## ISO83\_2.665\_M0

10

# U2B8

U 11.44353370 9.95836040 9.02558652  
U 8.82061304 7.94044014 10.33939906  
B 9.42782348 11.18501650 9.42188954  
B 8.05178143 10.73734202 8.27465307  
B 10.78111572 8.96849826 11.00772789

B 7.46852190 9.27931068 8.87667301  
B 9.14764120 9.42609342 8.44974477  
B 9.64610444 10.95424222 7.78631313  
B 8.18386669 10.22796736 10.04446865  
B 9.70390761 10.18799320 10.73039746

## ISO84\_2.716\_M2

10

# U2B8

U 10.96857001 11.39234523 10.39086396  
U 9.73168782 9.34024350 10.44486703  
B 9.69711642 10.75611157 8.31083086  
B 11.30604433 10.18847053 8.51047788  
B 8.57442407 9.32484285 7.95993284  
B 8.04368350 10.59027898 8.64253408  
B 11.25538690 8.59547114 8.51174998  
B 8.88954836 11.58440994 9.56027408  
B 9.49423178 8.04078261 8.16979810  
B 10.48471830 7.40167733 9.19090128

## ISO85\_2.721\_M4

10

# U2B8

U 7.68253334 8.46827622 9.90536221  
U 9.14623164 10.36763385 10.06673111  
B 9.82336620 8.00130717 10.54294050  
B 12.26630417 8.51601432 9.01205293  
B 8.80564859 8.96146073 7.97200839  
B 10.23078938 9.45820568 7.46685740  
B 11.29665099 8.58049370 10.27037422  
B 11.18603123 9.91953502 9.02973338  
B 10.21149363 8.34611514 8.86235317  
B 11.72996282 8.97877997 7.63140710

## ISO86\_2.752\_M2

10

# U2B8

U 8.67286735 8.65440898 8.96740677  
U 10.25484590 10.03504241 7.80909224  
B 10.14483835 9.86687647 10.53243005  
B 11.49892483 10.66349514 10.17908594

B 8.59496883 11.47181105 8.98778535  
B 7.84211781 10.56234917 7.87091682  
B 8.66498387 10.64429536 10.46710071  
B 11.57420518 11.57745387 8.92025054  
B 7.32944117 10.50329283 9.46970724  
B 10.05999041 11.50054052 9.84134134

## ISO87\_2.752\_M2

10

# U2B8

U 7.55077528 9.16556513 12.37286249  
U 8.49127938 7.84531061 10.60570673  
B 8.78952188 10.55390545 10.75290660  
B 9.62530374 9.32354373 13.44537251  
B 9.34833710 7.75162095 12.92208784  
B 10.31770431 8.72554738 12.05405603  
B 9.74223203 10.32070134 12.10798094  
B 10.28457428 9.60507166 10.60381140  
B 9.99967966 8.72871091 9.08905510  
B 9.32472453 10.11672995 9.29879545

## ISO88\_2.769\_M6

10

# U2B8

U 9.01430294 7.78089232 10.21128220  
U 10.43664575 9.39657235 11.27206648  
B 9.73616398 11.86840706 8.81682174  
B 8.25416384 10.10997861 10.39669496  
B 7.61530789 9.45123183 8.99031196  
B 9.16785226 11.20214349 7.51741126  
B 9.32604953 11.39613141 10.27157426  
B 8.12124133 10.03938523 7.61028545  
B 9.48340404 9.96826190 8.96642508  
B 8.13003055 11.13694350 9.00430871

## ISO89\_2.774\_M4

10

# U2B8

U 10.80251294 9.67109229 10.63507314  
U 9.14921072 8.04677744 11.39644113  
B 9.59039810 10.35112362 8.14471242

B 8.56593944 10.42909709 11.07205383  
B 7.83641489 9.44216150 10.02173138  
B 10.21475154 7.78739477 9.23392276  
B 11.70378628 8.49926547 8.87599859  
B 10.40834977 8.99549930 8.00633121  
B 8.77170218 10.74332623 9.42565577  
B 8.94627773 8.88222899 8.95233086

## ISO90\_2.800\_M0

10

# U2B8

U 9.76822275 10.13960949 11.97825647  
U 9.65595219 10.83982898 7.81653670  
B 7.69403249 11.04076287 10.87117146  
B 8.95641893 11.62911251 10.04469472  
B 10.16226180 8.23236684 10.79435003  
B 10.10814074 9.29566010 9.54309678  
B 10.52893864 11.05357988 9.89668726  
B 8.25828588 10.01807070 9.58048494  
B 7.47853811 9.49264855 10.97053869  
B 8.61431347 8.46627716 10.48922494

## ISO91\_2.803\_M2

10

# U2B8

U 11.17127069 8.91397356 10.31936320  
U 9.34453947 8.23125372 11.67785585  
B 7.53868247 10.11711326 9.30042080  
B 9.75927315 8.76021409 8.04090333  
B 8.81102761 10.00898333 8.37336613  
B 9.08055955 10.07598331 10.22267135  
B 11.01384921 7.79862571 8.36743020  
B 8.46365313 8.57032233 9.41280314  
B 9.66915508 7.44915369 9.23181384  
B 7.54210203 9.37839560 10.70771536

## ISO92\_2.803\_M4

10

# U2B8

U 7.68726691 8.84663070 10.80035160  
U 10.06272832 8.07361339 8.88116826

B 10.19513045 9.25083912 11.03820810  
B 8.38702877 9.69881619 8.68936214  
B 9.77710226 10.14100593 8.04199570  
B 9.51320057 10.86791015 11.27658008  
B 9.66853266 8.40451758 12.48521773  
B 9.50754855 9.94901381 12.52216909  
B 9.78306727 7.56887885 11.13519635  
B 9.63284044 10.38014537 9.77398645

## ISO93\_2.807\_M0

10

# U2B8

U 8.57879636 9.86781191 11.02406960  
U 9.65119903 10.87280468 7.97629038  
B 11.55719249 11.56058854 8.99567014  
B 7.85811672 9.68795655 8.83662722  
B 10.60286245 8.70774182 8.96400277  
B 9.85491450 8.03159957 10.30993053  
B 11.68900323 9.98592306 9.20428769  
B 8.94622259 8.51079662 8.99502267  
B 10.73710993 10.88950058 10.32363728  
B 10.92915812 9.23594588 10.55523493

## ISO94\_2.810\_M6

10

# U2B8

U 8.83174522 9.73855997 8.55067092  
U 7.95960968 7.36657136 8.98533381  
B 10.45458166 10.81642025 10.07436329  
B 8.95744395 10.70760912 10.82141139  
B 7.78368168 9.44365391 10.62916598  
B 8.87151160 9.43638011 11.87469788  
B 10.25297035 9.33944869 10.93448648  
B 9.05863545 8.09248799 10.89907154  
B 11.11827338 9.46563995 9.54291126  
B 10.25045143 8.06746265 9.59422965

## ISO95\_2.825\_M6

10

# U2B8

U 8.91524027 9.72836671 9.53513858

U 11.51506267 10.59946710 9.35549850  
B 8.27361677 8.81531366 12.34559718  
B 10.88973833 9.54257171 11.45657697  
B 10.21084415 11.07197482 11.50414970  
B 9.44809023 9.86339079 12.33965987  
B 10.87832192 8.50129833 10.22330416  
B 9.86349680 11.94790481 10.21996524  
B 7.97958654 8.12024427 10.99415308  
B 9.67691753 8.31402760 11.41251682

## ISO96\_2.829\_M4

10

# U2B8

U 9.07327143 8.12757627 11.21553419  
U 11.36315690 8.69920986 10.69171674  
B 8.98115886 10.18476987 7.88806912  
B 10.46767157 9.92379120 7.50527076  
B 7.85501542 9.93743494 10.77782903  
B 8.11275649 9.95888289 9.19643372  
B 10.55265770 10.54414357 9.15676223  
B 11.62804234 9.44790648 8.48357133  
B 9.47984476 10.31476644 10.37939972  
B 9.71684933 8.96068828 8.95606667

## ISO97\_2.829\_M4

10

# U2B8

U 10.58309676 9.11191335 8.23808376  
U 8.43381697 8.28966524 8.97928636  
B 8.25946909 10.68560424 11.56395303  
B 10.33431391 8.66818557 10.55984675  
B 8.94287528 9.07368339 11.33312672  
B 9.79812489 10.91741265 11.62030996  
B 9.30079520 10.27066190 10.03507490  
B 11.03947973 10.35129241 10.81046451  
B 7.49510192 9.60794156 10.67790172  
B 11.87583095 9.21834670 10.04646370

## ISO98\_2.843\_M0

10

# U2B8

U 9.90867715 11.20860704 10.23127261  
U 8.04361902 8.36821764 10.59765008  
B 9.29466331 9.49797735 8.49311456  
B 7.47794303 10.74622494 10.40845175  
B 10.26402168 7.86988141 10.98443613  
B 11.02481821 9.24692129 10.97143363  
B 8.80677060 11.03131497 8.06282882  
B 7.78024687 11.70950665 9.09755950  
B 10.27511730 8.79974773 9.55907692  
B 7.77267844 10.05580958 8.90668080

## ISO99\_2.855\_M6

10

# U2B8

U 11.76799448 9.89189072 9.62002920  
U 10.20935047 9.03752923 11.52716164  
B 8.77959547 8.20348529 9.73148626  
B 9.11517075 8.20798510 7.90572799  
B 8.08671204 9.80320719 9.81768137  
B 7.82004456 8.94043830 8.49202282  
B 9.46409836 10.73901360 10.03769576  
B 10.39002665 8.03968839 9.29211078  
B 10.70190539 8.79942878 7.81207691  
B 9.49127122 9.69014580 8.73730198

## ISO100\_2.856\_M6

10

# U2B8

U 8.60797904 7.83350322 8.45093527  
U 9.21380929 10.22275403 7.60563280  
B 7.38614754 9.72532369 9.22166280  
B 10.30421114 10.99563843 9.55749169  
B 8.73286101 9.80464018 11.77183346  
B 8.72644206 10.34297446 10.00423404  
B 9.32585154 8.63032738 10.64533453  
B 10.29635968 9.30588801 9.45614290  
B 10.09663289 10.26466370 11.07418261  
B 7.66364651 9.14696900 10.77357041

## ISO101\_2.859\_M4

10



## # U2B8

U 11.63954294 9.33726626 9.61071187  
U 10.88160306 11.67745766 10.05012166  
B 10.34664553 10.72497294 8.04994199  
B 8.93408209 10.54106608 9.11996102  
B 9.52727379 9.96243573 10.69711405  
B 9.24072335 8.64142148 9.75207306  
B 10.29254841 7.69873887 8.72178335  
B 8.05612601 9.31529848 8.49528412  
B 9.81005303 9.17144046 7.91244628  
B 8.71287510 7.90598783 8.29256169

## ISO102\_2.863\_M0

10

## # U2B8

U 7.88544722 8.96931705 9.71905388  
U 9.67911859 11.38803193 7.93334895  
B 10.38924911 8.47670558 10.87650724  
B 10.36113893 9.90333627 9.80932513  
B 7.93906256 11.30431731 9.34470589  
B 8.94874876 8.37295132 11.66805240  
B 9.25730354 11.08073757 10.29904243  
B 10.02851827 9.08727650 8.24852033  
B 9.52772338 9.85824031 11.37249573  
B 10.76720063 8.26429916 9.35363533

## ISO103\_2.868\_M2

10

## # U2B8

U 12.33405306 10.89649036 11.23326524  
U 10.19062078 11.92562532 11.19256099  
B 10.52449882 10.82041112 9.08491728  
B 10.37658447 9.63080454 10.80525680  
B 11.08761599 9.49808302 8.02269040  
B 9.04245029 10.30930580 9.92644917  
B 9.74709699 9.27721825 8.84537225  
B 11.57398876 9.26664613 9.67894966  
B 12.22698226 10.45760205 8.68186794  
B 11.69516918 12.01179631 9.31824516

## ISO104\_2.883\_M6

10

# U2B8

U 9.95038175 11.43906266 8.13154725  
U 8.20678191 11.34706071 10.37561497  
B 10.10879912 9.36803865 11.18256209  
B 9.86183031 7.92864097 10.51470114  
B 9.01593869 7.94501472 9.18474049  
B 8.50916797 9.00564523 10.45337783  
B 7.72067629 10.75588534 8.18918028  
B 10.01474635 9.41316383 9.42086129  
B 10.53817039 10.72746793 10.35482611  
B 8.23462823 9.31598307 8.73845684

ISO105\_2.895\_M4

10

# U2B8

U 10.60169677 8.76931172 10.21939944  
U 7.63382530 10.50849389 9.43787769  
B 9.70768273 8.12830557 8.12695286  
B 8.62260534 9.62888119 11.36777354  
B 9.86438027 11.21047063 8.96065810  
B 9.83100336 9.82468411 7.99797085  
B 8.38675488 8.99170018 7.75514781  
B 8.14121409 8.35401750 10.63842569  
B 11.23082060 10.48675306 8.80303712  
B 8.36437627 8.00415045 9.08914201

ISO106\_2.906\_M4

10

# U2B8

U 9.36101582 10.64128644 11.20974215  
U 8.66666706 9.66085246 7.86676901  
B 10.50031624 10.97195404 8.98897703  
B 9.07830811 11.64648519 9.08644310  
B 7.86458775 9.03996862 10.10266177  
B 9.09139204 8.32223046 10.93500968  
B 11.29579589 9.89087710 9.99969212  
B 8.76889764 7.86666863 9.38249481  
B 10.97990930 9.44515005 8.47838457  
B 10.30346735 8.52568612 9.74686176

## ISO107\_2.907\_M0

10

# U2B8

U 9.68659671 11.87893198 10.48658600  
U 7.86814211 8.87127143 10.49210337  
B 10.30310816 9.44792655 8.14425020  
B 10.22438090 9.49914889 9.86745555  
B 10.95604384 10.79553359 8.87393861  
B 7.92894553 10.88577436 9.09299866  
B 9.41378446 8.24624529 8.87793791  
B 9.66862724 9.83815620 11.38951424  
B 9.39893713 10.96390413 8.32022969  
B 8.54059133 9.54551488 8.32243067

## ISO108\_2.910\_M2

10

# U2B8

U 11.18180950 9.54546868 10.49482490  
U 11.49032352 7.72365846 8.98975047  
B 9.43546814 10.57696953 9.28042549  
B 10.70400555 10.15862185 8.10295100  
B 7.97042865 10.07605198 8.53061126  
B 9.17746201 10.37488930 7.56585199  
B 8.31998839 9.31399449 9.89647609  
B 9.41451340 8.87029009 8.52955701  
B 9.33909302 8.05810307 10.03232893  
B 12.27173372 9.74537926 8.46183926

## ISO109\_2.911\_M6

10

# U2B8

U 11.44571998 8.55421127 8.39257032  
U 9.27604925 7.55514609 9.85369063  
B 11.36685652 8.53486833 10.63866855  
B 8.08018738 9.50268833 9.17594906  
B 8.91072025 10.46403305 10.40102900  
B 10.41058117 9.80744019 10.47325237  
B 8.26562504 11.21646150 9.12398194  
B 8.42223177 10.46464503 7.75210154  
B 9.01649588 8.91996308 7.84036493  
B 9.77506265 10.18315064 8.91252407

## ISO110\_2.911\_M6

10

# U2B8

U 8.18572225 8.66004915 11.22185517  
U 10.55206829 10.14856816 11.36749587  
B 8.68850283 10.51677615 9.71221817  
B 8.21076203 9.07596016 8.87542688  
B 9.43401599 7.82363269 8.63612929  
B 9.27800172 8.98486486 7.52344423  
B 10.34756418 7.90284272 9.99264794  
B 10.00619427 9.38288483 9.16939542  
B 10.47722473 7.91308720 11.58771672  
B 9.00363750 10.42636348 8.08792091

## ISO111\_2.928\_M4

10

# U2B8

U 9.05058306 9.99942960 10.65504681  
U 11.30688236 10.76436722 9.14024954  
B 9.74703495 7.73770065 9.79249786  
B 10.01716940 8.78125723 8.21101067  
B 8.18267422 7.94382744 10.21461391  
B 9.02846218 10.06938751 8.20524570  
B 11.02265622 8.76271498 10.69249980  
B 11.20683850 8.30499573 9.19164474  
B 8.43492965 8.57996410 8.77500355  
B 9.22519546 11.57517735 8.76066453

## ISO112\_2.944\_M0

10

# U2B8

U 10.57998505 9.66908376 10.65696298  
U 8.87215974 11.32727655 10.50746754  
B 8.80540041 9.85923180 8.59700745  
B 8.97214996 10.11779225 12.50110296  
B 8.22931407 8.90230518 9.83939501  
B 10.28107807 9.26140644 8.03621949  
B 9.30604294 8.27131087 8.76923827  
B 10.17415693 10.80543061 8.53481761  
B 8.21811242 8.92765077 11.46432969  
B 9.41410331 8.59400037 12.48036089

## ISO113\_2.944\_M0

10

# U2B8

U 7.68963789 10.88422451 10.49888520  
U 9.98082398 10.79586649 11.15675489  
B 9.45311033 9.86380789 8.78298689  
B 8.24704525 8.70263734 11.35832234  
B 8.26853654 9.81782341 12.59424045  
B 9.38354308 8.63483035 12.60411174  
B 10.67821422 10.89924730 8.84753679  
B 9.25290346 11.59376672 8.91697594  
B 9.80968725 8.12943571 11.17897927  
B 9.01697269 8.74264498 9.87613450

## ISO114\_2.945\_M4

10

# U2B8

U 9.92433439 8.75934951 8.91577431  
U 8.86240526 11.61826729 10.55297295  
B 11.08986448 10.92995708 9.47696367  
B 10.03820935 11.26787381 8.34804114  
B 10.95805718 10.19343686 10.81031420  
B 8.53510441 11.95803277 8.28367272  
B 8.94074593 7.97126466 10.85028014  
B 8.17450120 9.34309719 10.86319223  
B 9.77179554 9.31990480 11.38265475  
B 8.65839467 10.45845743 7.81627070

## ISO115\_2.950\_M4

10

# U2B8

U 8.21890876 11.03839157 8.60211250  
U 9.50539375 11.24795707 10.68939017  
B 10.66392185 8.17664698 11.05275572  
B 10.40701855 10.24792858 8.66334110  
B 10.81930486 9.64287919 11.66583550  
B 10.22165641 8.21678111 8.10434168  
B 10.50528404 7.71133602 9.56125483  
B 11.02035568 9.45583810 9.99171598  
B 9.24617597 9.03377738 9.37470316

B 9.41646694 9.45918680 7.49192065

ISO116\_2.962\_M2

10

# U2B8

U 9.01977511 11.14950191 10.75787218  
U 10.79734570 9.86152302 9.80574349  
B 10.67666651 10.08613857 12.10148899  
B 9.87366230 8.77881814 7.97870903  
B 9.41204915 9.11365481 12.10320415  
B 8.96715637 8.09252888 9.10631787  
B 7.83893239 9.26917062 11.52510790  
B 8.92309835 8.22514085 10.78444318  
B 7.78605997 9.11130833 9.89368426  
B 8.64050955 9.69281367 8.61901296

ISO117\_2.971\_M4

10

# U2B8

U 12.79938297 11.95341518 9.34631583  
U 14.66981137 11.80110454 10.90989323  
B 11.72416462 10.49559286 12.27046819  
B 10.20360590 10.23706359 11.96226471  
B 10.52426768 11.33691194 9.43992964  
B 12.94573086 10.23024445 11.04737979  
B 11.36801299 10.14582010 10.50404427  
B 9.62511224 10.65508960 10.56744218  
B 12.49982751 11.97938653 11.75368341  
B 10.96286285 11.73613691 11.14840552

ISO118\_2.982\_M4

10

# U2B8

U 10.38827644 9.89738565 10.86476453  
U 8.20340968 10.64598591 10.25546013  
B 11.17378642 9.52080342 8.72055300  
B 8.86559922 8.42104905 9.82721355  
B 8.45931637 10.44933995 7.96322593  
B 10.03382336 10.83583740 8.60700530  
B 7.97446139 8.83735755 8.30711215  
B 9.02431122 7.59717739 8.25350864

B 10.41559452 8.00204362 8.99078359  
B 9.61094398 9.26113686 8.19155469

## ISO119\_2.985\_M4

10

# U2B8

U 8.60084089 12.27212019 7.78160574  
U 10.26943419 10.50667436 8.06358966  
B 11.41248799 8.41141457 8.26290055  
B 11.40330337 8.25428242 9.81997315  
B 10.13346242 8.91283297 10.53189403  
B 9.94009222 8.15867506 8.98384841  
B 9.29212808 10.31662928 10.53035157  
B 8.70752511 9.05306917 9.50459080  
B 9.06518937 11.79635164 9.90683367  
B 8.05915865 10.55805153 9.26988182

## ISO120\_2.989\_M4

10

# U2B8

U 10.72963213 10.53028253 10.06319254  
U 7.20558860 9.95477195 10.71061668  
B 9.52887130 9.71874216 8.10871533  
B 9.19898266 10.42672822 11.91700211  
B 9.28752229 9.02422432 11.24103828  
B 9.17779297 8.70282098 9.62764945  
B 8.43018196 10.58953328 8.87473140  
B 7.93665192 8.99530958 8.37930573  
B 9.17724191 8.03263526 7.99169461  
B 10.61628396 8.54504131 8.59880227

## ISO121\_2.992\_M4

10

# U2B8

U 11.45387625 10.65755710 9.16677732  
U 8.03808612 8.90059647 11.28644260  
B 9.70203169 7.98764683 9.95115171  
B 10.65258913 8.39704274 8.49167373  
B 10.05852586 9.53450964 7.51782660  
B 8.93162915 10.48620185 9.90072390  
B 11.36347567 8.49258597 9.94640013

B 10.21656569 9.51023724 10.86452747  
B 9.20553714 10.66523714 8.26926166  
B 9.06241530 9.09004622 8.79713548

## ISO122\_3.001\_M0

10

# U2B8

U 10.63962987 9.82350968 12.10253156  
U 11.91295278 9.14139136 9.41075074  
B 9.58264187 10.07302467 8.85255417  
B 11.63701265 11.30131384 10.45357303  
B 10.03822543 11.30526429 10.23062693  
B 8.90816470 10.16308813 10.39521517  
B 9.53663464 8.72594215 10.09419385  
B 10.62567184 7.86215498 10.90589546  
B 10.77600667 10.16521126 7.75411782  
B 11.04309216 11.31396795 8.87153267

## ISO123\_3.007\_M2

10

# U2B8

U 8.98606938 7.97438916 9.91390461  
U 10.77786820 9.53439134 9.67101703  
B 8.38243108 10.57713215 10.44437042  
B 7.65620782 10.48615580 12.16768131  
B 7.68564419 9.06589988 11.50917495  
B 9.31642178 9.69321023 11.64851496  
B 10.11450628 11.18164606 11.17921585  
B 8.82635959 11.50568757 12.00828164  
B 8.45167315 10.25333704 8.87166920  
B 9.19627423 9.25707007 7.95994864

## ISO124\_3.011\_M0

10

# U2B8

U 9.18009525 11.00014382 12.59406461  
U 9.75759449 10.54703851 8.26115698  
B 9.31976338 9.06000064 10.69599423  
B 9.52475708 8.31714100 9.20419176  
B 10.77471202 9.05827680 9.88628848  
B 10.47742206 10.41817790 10.79786679



B 8.11471181 9.07314244 9.42024460  
B 7.71199249 10.64531353 9.32185931  
B 7.90409213 10.00926099 10.92174592  
B 8.95013069 11.41342437 10.33926233

## ISO125\_3.025\_M4

10

# U2B8

U 10.46003342 10.99630288 10.92625203  
U 8.12536190 11.02618087 10.57262598  
B 8.07142029 10.40240909 8.28144265  
B 7.82297944 8.87936300 8.86346812  
B 8.91871337 7.73137651 8.65822763  
B 10.43980446 8.14669226 8.60942015  
B 10.94504793 9.63363663 8.99228709  
B 9.65795031 10.85584522 8.70954524  
B 9.29985231 9.29988715 7.96600412  
B 9.43238428 9.06388789 9.80883839

## ISO126\_3.025\_M4

10

# U2B8

U 10.07195579 10.15989867 8.04380570  
U 7.96252566 9.13816450 8.28331278  
B 9.68143983 8.74967146 10.02696249  
B 8.96043969 9.69571475 11.45099113  
B 9.51432279 8.04589517 11.72043389  
B 10.61824929 9.15634915 11.53893297  
B 10.50253062 10.31885958 10.42495917  
B 8.80267713 10.64873805 9.98007656  
B 7.52647625 9.68434105 10.56481284  
B 8.13349765 8.20707282 10.93484707

## ISO127\_3.026\_M8

10

# U2B8

U 10.15948551 10.65740741 10.72411665  
U 11.99167729 8.72311999 9.70036570  
B 8.25001032 8.16544725 8.95979758  
B 9.74443738 8.15188217 8.34621098  
B 9.83750034 11.07712814 8.35343909

B 11.42643324 10.76736895 8.55467122

B 8.18932598 9.22380081 10.17505679

B 9.62747367 8.34051265 10.06286775

B 8.84546226 9.79437601 8.68013850

B 10.48698979 9.59740553 7.93055493

---
